1 Small intestine lactobacilli growth promotion and  
2 immunomodulation in weaner pigs fed *Cyberlindnera*  
3 *jadinii* yeast high inclusion diet and exposed to  
4 enterotoxigenic *Escherichia coli* F4<sup>+</sup>: O149

5

6 Iakhno, S.<sup>1\*</sup>, Hellestveit, S.S.<sup>2</sup>, Umu, Ö.C.O.<sup>1</sup>, Bogevik, L.T.<sup>3</sup>, Åkesson<sup>2</sup>, C.P., Göksu<sup>2</sup>, A.B.,  
7 Press, C.McL.<sup>2</sup>, Mydland, L.T.<sup>4</sup>, Øverland, M.<sup>4</sup> and Sørum, H.<sup>1</sup>

8 1 Department of Paraclinical Sciences, Faculty of Veterinary Medicine, Norwegian University of  
9 Life Sciences, Oslo, Norway 2 Department of Preclinical and Pathological, Faculty of Veterinary  
10 Medicine, Norwegian University of Life Sciences, Oslo, Norway 3 Norsvin R&D, Storhamargata  
11 44, 2317 Hamar, Norway 4 Faculty of Biosciences, Norwegian University of Life Sciences, Ås,  
12 Norway

13 \* stanislav.iakhno@gmail.com

14 **1 Abstract**

15 Enterotoxigenic *Escherichia coli* (ETEC) F4<sup>+</sup>: O149 is a causative agent for the development  
16 of post-weaning diarrhoea (PWD) in pigs that contributes to production losses. Yeast cell wall  
17 components used as a feed additive can modulate gut immunity and help protect animals from  
18 enteric infections. This work investigated how a novel yeast diet with high inclusion of yeast  
19 proteins (40% of crude protein) affected the course of ETEC mediated diarrhoea in weaner  
20 piglets from a farm with or without a history of post-weaning diarrhoea. We found that immune  
21 response to F4ab ETEC infection and appetite of the animals were altered by high inclusion *C.*  
22 *jadinii* yeast. The results indicate that the novel diet can support the diseased animals either  
23 directly through the effect of yeast beta-glucans and mannans or indirectly through the promotion  
24 of small intestine lactobacilli or both.

## 25 **2 Introduction**

26 Diarrhoea in neonatal and weaned piglets has been a concern to farmers due to the morbidity and  
27 mortality [1, 2]. The introduction of *E. coli* fimbrial vaccines [3] shifted the peak of diarrhoea  
28 from the neonatal and suckling period over to the weaning period where the mortality due  
29 to diarrhoea is lower [4]. An enterotoxigenic *Escherichia coli* (ETEC) of the O149 serotype  
30 has been incriminated in most of the post-weaning diarrhoea (PWD) cases contributing to  
31 production losses [2, 5–7]. This enteric pathogen acts via (I) the adhesion to small intestine  
32 enterocyte brush border with the help of receptor-specific fimbriae proteins F4 (K88) (*ab*,  
33 *ac*, and *ad* variants) and (II) the production of toxins that induce enterocyte electrolyte/fluid  
34 imbalance hence watery diarrhoea. However, not all piglets are equally susceptible to ETEC.  
35 Some animals are immune to ETEC F4 *ab/ac* colonization due to an inherited trait that is  
36 thought to be linked to chromosome 13 of the pig [8]. A 74-kDa glycoprotein (GP74) was found  
37 to be key for ETEC adherence [9] but the genetic determinants encoding for this protein are  
38 not fully investigated [8, 10, 11]. Polymorphism in the *muc4* gene was used as a basis for a  
39 DNA test to classify animals as either F4-adhesive or F4-non-adhesive [8]. Other candidate  
40 genes have been proposed as genetic determinants for the non-adhesive porcine phenotype [11].  
41 The receptors for F4 *ab* fimbriae are found in the small intestine of newborn and weaned  
42 piglets [12] but not in older F4-adhesive animals [13]. While nursing piglets are protected from  
43 ETEC by maternal transfer of antibodies from vaccinated dams [3, 14], there are currently no  
44 measures available to protect piglets against ETEC-mediated diarrhoea after weaning (discussed  
45 in [15–17]). Modulation of the immune response against ETEC may be one such solution. Yeast  
46 cell wall components, mannans and beta-glucans proved potent immunomodulatory compounds.  
47 Fohse and co-workers demonstrated that supplementation of yeast-derived mannans to weaner  
48 pigs positively affected jejunal villi architecture with corresponding changes in the gene expression  
49 profile [18]. The findings of Che et. al suggested that yeast mannans in feed could reduce systemic  
50 inflammation in pigs via suppression of lipopolysaccharide (LPS) induced TNF-alpha by alveolar  
51 macrophages [19]. Stuyven and colleagues reported protective effects of *Saccharomyces cerevisiae*,  
52 and *Sclerotium rolfsii* derived beta-glucans against ETEC F4<sup>+</sup> with a reduction in pathogen  
53 shedding and F4-specific serum antibodies in weaner pigs [20]. Our previous work showed that  
54 feeding a strain of heat-inactivated *Cyberlindnera jadinii* yeast as a protein source changes the

55 intestinal microbiota composition in weaner piglets [21]. Using cultivation and 16S *rRNA* gene  
56 metabarcoding sequencing techniques, we have shown that the yeast diet promoted the growth of  
57 small intestine lactobacilli. Beneficial immunomodulatory properties of intestinal lactobacilli are  
58 well documented ([22]; reviewed in [23]). These findings indicate that targeting the lactobacilli  
59 populations through diets can have an indirect impact on the host immune response.

60 Because beta-glucans and mannans are structural components of the yeast cell wall, and yeast  
61 replaced as much as 40% of the conventional proteins in the experimental diet, we hypothesized  
62 that *C. jadinii* yeast as a protein source can modulate the immune response towards ETEC F4<sup>+</sup>  
63 and hence affect the course of PWD in weaner piglets.

64 To test the ability of a *C. jadinii* yeast diet to modify the course of PWD, we recruited piglets from  
65 two herds (with and without a history of PWD), primed them with either control or yeast-based  
66 diets where 40% of the protein was replaced with yeast, and orally challenged weaned piglets  
67 with a haemolytic F4ab<sup>+</sup> O149 *E. coli* isolated previously from the herd with the history of  
68 PWD. To gain insights into the effects of yeast-derived feed, we compared gut microbial ecology  
69 metrics (diversity and composition), zotechnical performance, morphology and histology of  
70 gastrointestinal (GI) tract focusing on the ETEC F4<sup>+</sup> intestinal colonization between the control  
71 and the yeast-fed piglet groups.

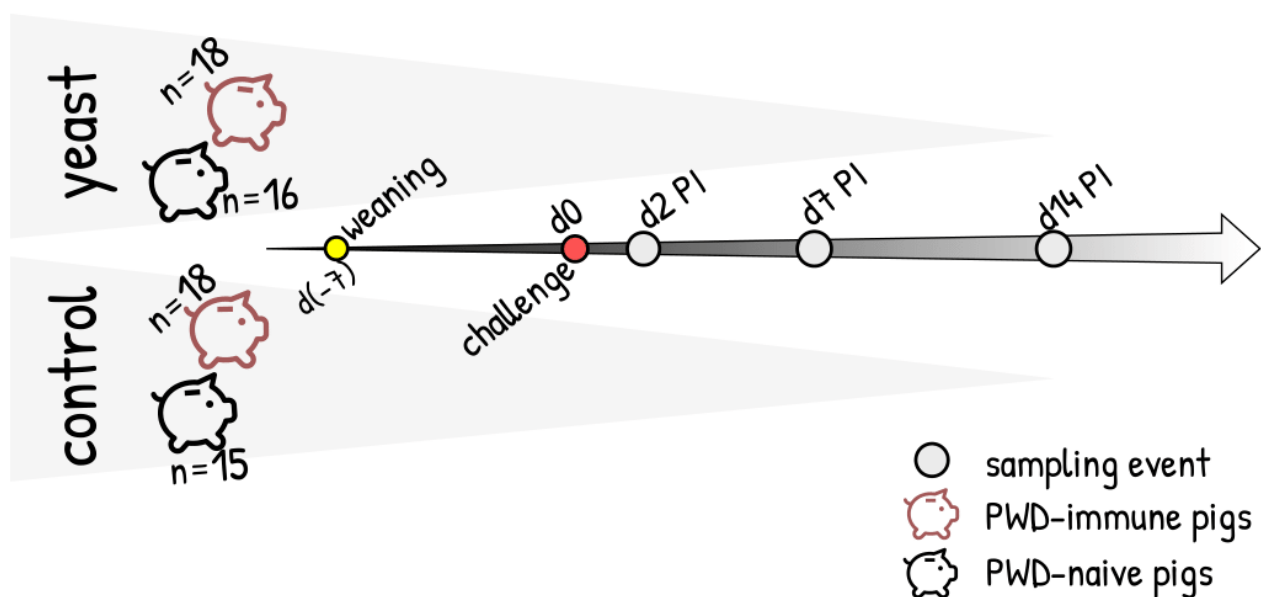

Figure 1: Overview of the experimental design

## 72 **3 Results**

### 73 **3.1 General information**

#### 74 *Post-weaning diarrhoea (PWD)*

75 Of 68 piglets in the experiment, one animal from the control feeding group was euthanized *ad*  
76 *hoc* because of circulatory failure on d5 post-weaning (PW). There were no mortality cases due  
77 to the bacterial challenge throughout the experiment. Diarrhoea scores were higher for the first  
78 three days after the challenge in the piglets from the herd with no history of PWD (F4-naive  
79 herd) compared with those of the herd with the history of PWD (F4-immune herd) (Figure 2A).

#### 80 *Average daily gain (ADG)*

81 Average daily gain (ADG) was analysed by fitting the multiple regression model where “day”,  
82 “litter”, and “diet” were the predictor terms (d2 PI was excluded). The analysis revealed that the  
83 pigs fed the yeast-based diet tended to gain 62 g/day less weight than those fed the control diet  
84 (Figure 2B). The litter contribution to ADG estimate was as follows: litter3283, and litter3286  
85 pigs tended to gain 125 g/day less than litter 3282 ( $p < 0.00001$ ); litter 3284 was gaining 86 g/day  
86 less than litter3282 ( $p = 0.002$ ); and litter3287 had 57 g/day greater ADG compared with that of  
87 the litter3283 ( $p = 0.03$ ).

#### 88 *Feed intake*

89 The feed intake pattern (pen level) diverged between the herds from d3 PI to d5 PI with the  
90 F4-immune herd piglets eating more than those of the F4-naive herd. Within the herds, feed  
91 intake pattern showed that the control piglets ate more than the yeast fed piglets. From day 8  
92 PI onwards, the effect of herd was less pronounced and changes in feed intake were attributed to  
93 the diet with the control group eating more feed than the yeast group (Figure 2C).

### 94 **3.2 Immunohistochemistry**

95 *F4 and CD3 in the ileum d2 PI* The proportion of the mucosa-associated ETEC F4<sup>+</sup> per length  
96 of the ileum epithelium tended to be 5% greater in the pigs fed the yeast based diet than that of  
97 the pigs fed control diet (89% posterior probability)(Figure 3A). The piglets from the litter3288

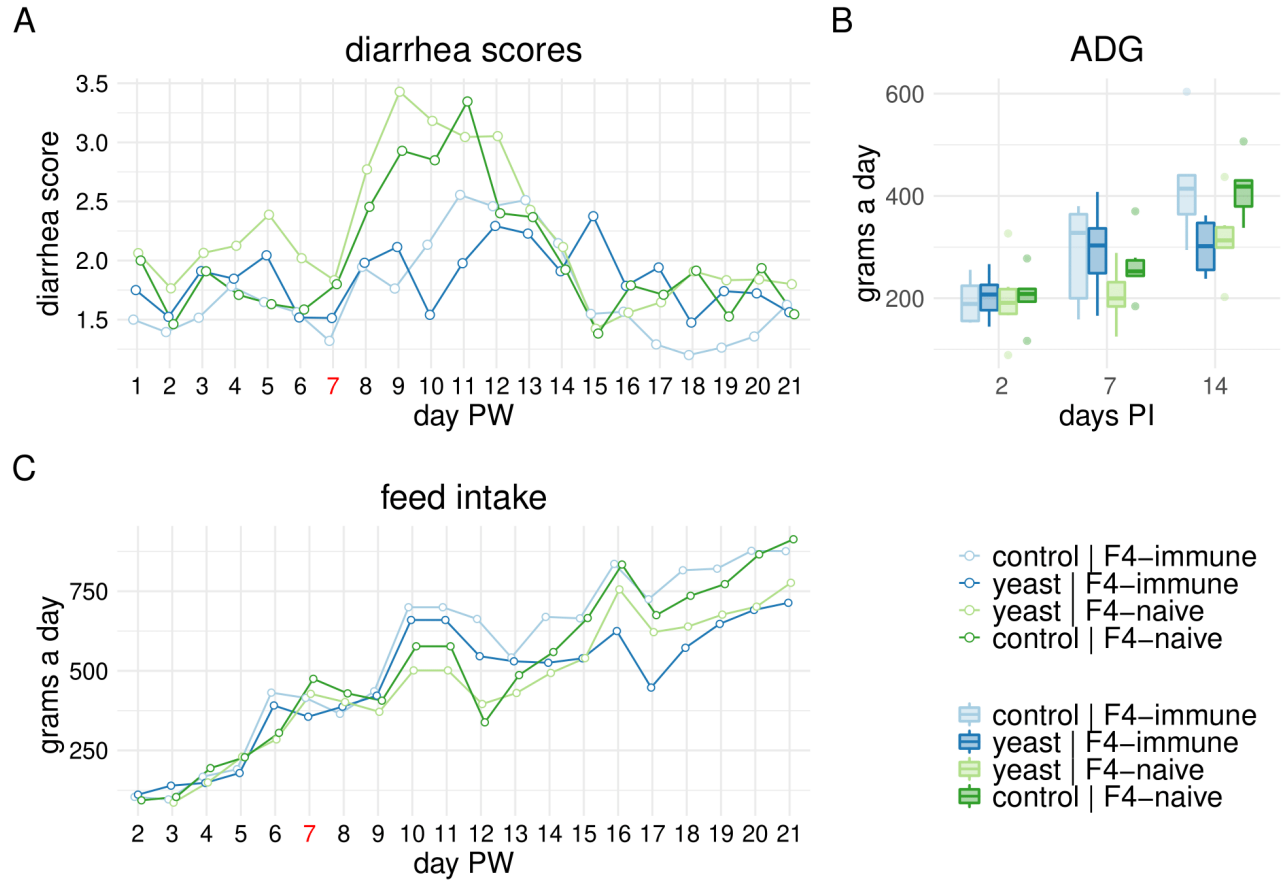

Figure 2: Diarrhoea scores and performance results. Panel A: Diarrhoea scores (pen level) across the experimental groups throughout the experiment. Day 7 post-weaning (coloured red) corresponds to the day the animals were orally challenged with ETEC F4<sup>+</sup>. Panel B: Distribution of the average daily gain (ADG) across the experimental groups at d2, d7, and d14 post-infection. Panel C: Daily feed intake across the experimental groups throughout the experiment. Day 7 post-weaning (coloured red) corresponds to the day the animals were orally challenged with ETEC F4<sup>+</sup>.

98 had 10% less mucosa-associated ETEC F4<sup>+</sup> per length of the ileum epithelium than that of the  
99 litter3282 (89% posterior probability) (not shown).

100 At d7 PI, the prevalence of F4<sup>+</sup> *E. coli* was lower in the ileum of the piglets fed both diets than  
101 that of d2 PI. Only two piglets in the yeast group had identifiable counts of F4<sup>+</sup> adjacent to the  
102 epithelial surface compared with none of the control group. The remaining animals (n=16) were  
103 negative for the presence of F4<sup>+</sup> *E. coli* in their ileum.

104 There was no clear relationship between neither the diet type, nor the litter, and the proportion  
105 of IEL CD3<sup>+</sup> cells in the ileum epithelium of the pigs (Figure 3B). However, there was an inverse  
106 correlation between the proportion of mucosa-associated F4 antigen and the proportion of IEL  
107 CD3 populations in the ileum of the piglets fed the control diet at d2 PI ( $\rho=-0.81$ , 95%CI  
108 upper = -0.25, 95%CI lower = -0.94) (Figure 3B). This relationship was not found in the yeast  
109 fed piglets ( $\rho=0.1$ , 95%CI upper = 0.58, 95%CI lower = -0.44) (Figure 3C).

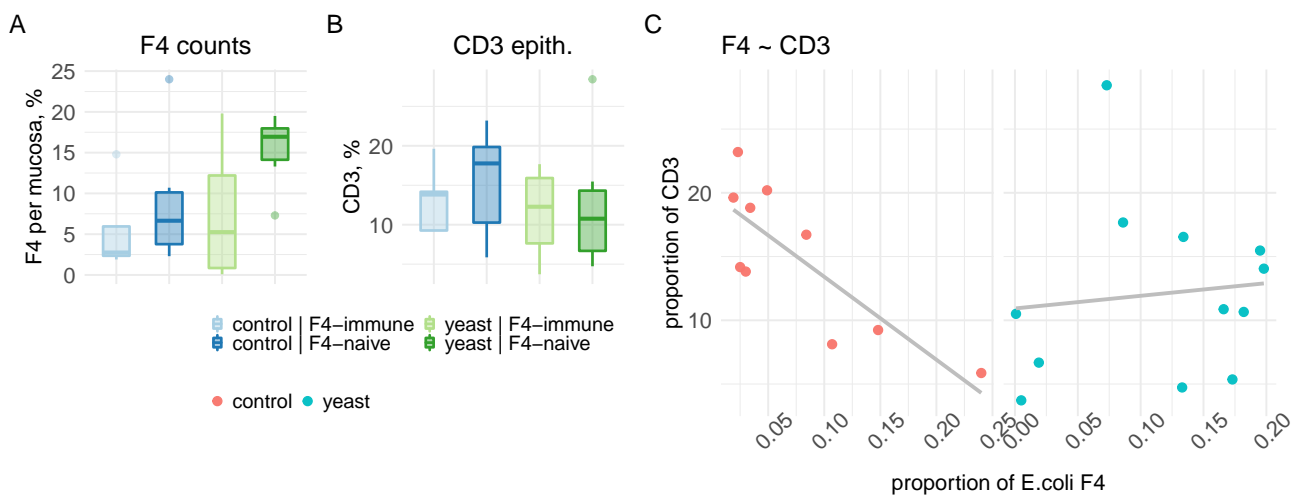

Figure 3: Immunohistochemistry results (d2 PI). Panel A: Distribution of the proportion of the mucosa-associated *E. coli* F4<sup>+</sup> per mucosa section (lumen content excluded) across the experimental groups on d2 PI. Panel B: Distribution of the proportion of IEL CD3<sup>+</sup> cells in the epithelium across the experimental groups on d2 PI. Panel C: Correlation between the mucosa-associated F4<sup>+</sup> *E. coli* and IEL CD3<sup>+</sup> cells in the epithelium of control-fed (red dots) and yeast-fed (blue dots) piglets

## 110 **3.3 Microbial ecology**

### 111 **3.3.1 Sequencing results**

112 Microbiota profiling was conducted on the ileum (n=63), caecum (n=67), and colon (n=66)  
113 digesta contents samples from pigs slaughtered on day 2, 7, and 14 PI (change to PW and same  
114 for the graph). Two sequencing runs produced a total of 58,045,034 raw reads. On average  
115 there were 71670 (SD=14239) reads per sample after filtering, denoising, and chimera removal  
116 (one sample with < 10,000 reads was deleted) (Supplementary Figure 10). Those reads were  
117 demultiplexed into 180, 856, and 906 unique amplicon sequence variants (ASVs) per ileum,  
118 caecum, and colon datasets, respectively (taxa not seen not more than once in 5% of a dataset  
119 were removed).

### 120 **3.3.2 Alpha diversity**

121 Alpha microbial diversity comparison was made between the diet groups on day 2, 7, and 14 PI  
122 using the DivNet method to infer on the Shannon index. The ileum gut microbial communities  
123 of the yeast fed pigs were similar on the modelled Shannon index at d2 PI to those of the control  
124 diet. On d7 PI the ileum microbiomes of the yeast fed pigs showed a higher diversity than those  
125 of the control diet (Figure 4). This difference became more pronounced on d14 PI (Figure 4). As  
126 with the ileum, the microbial communities in the caecum of the yeast fed pigs were not different  
127 than those of the control at d2 PI. However, the caecal communities of the control diet-fed piglets  
128 were more diverse compared with those of the yeast diet (Figure 4).

Shannon diversity

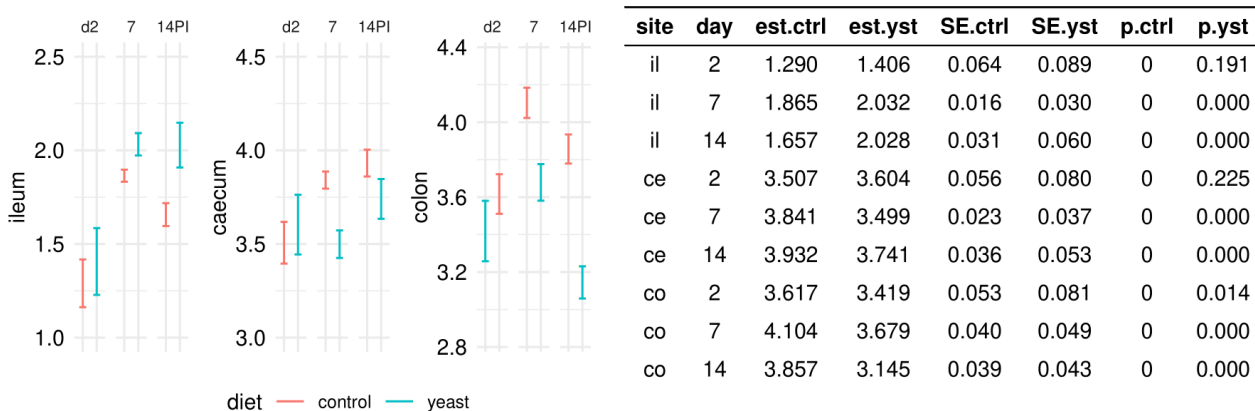

Figure 4: Alpha microbial diversity. Left: Estimates of DivNet inferred Shannon diversity indices with its uncertainty across gut sites (ileum, caecum, and colon), diets (control, yeast), and time (d2, d7, and d14 PI). The diet coloured intervals represent 4 standard errors (SE) (+2SE and -2SE around the estimate). Right: Summary of the DivNet statistical test for differences in the inferred Shannon diversity indices between the control and yeast diets: *site* shows the gut site microbiomes were derived from, *day* indicates the day post-infection when the samples were collected, *est.ctrl* and *est.yst* show the estimates of the Shannon index inferred by the model for the microbiomes of the pigs fed either the control or the yeast diets, respectively, *SE.ctrl* and *SE.yst* show the standard errors of the estimates of the Shannon index inferred by the model for the microbiomes of the pigs fed either the control or yeast diets, respectively, *p.ctrl* and *p.yst*, show the p-values derived from testing the difference in the Shannon diversity indices between the control and yeast groups, respectively



### 129 **3.3.3 Beta diversity**

130 To study the impact of diets on beta microbial diversity in the intestines of ETEC challenged  
131 pigs, a multivariate model with permutations was fitted to the phylogeny-informed community  
132 data (see methods).

133 **day 2 PI** Although the **diet** was associated with the variance in the microbial communities on  
134 d2 PI across the **ileum, caecum, and colon** ( $R^2 = 9\%$ ), the **litter** (parental genetics) was a  
135 much **stronger predictor** of the variance in the respective microbiomes ( $R^2=38\%$ ) (Figure 5,  
136 Supplementary Figure 11).

137 **day 7 PI** The litter could predict 27.9% of the variance in the microbial data from the **ileum**  
138 of pigs sampled on d7 PI, while the diet was not a statistically significant predictor of the  
139 variance. The proportion of the variance in the microbial data explained by **diet increased**  
140 for the large intestine microbiomes at d7 PI ( $R^2=14.7\%$ ) compared with d2 PI. Reciprocally,  
141 the **litter** accounted for **less variance** of the unweighted Unifrac distances of the respective  
142 microbiomes (**caecum, colon** d7 PI) ( $R^2=24.2\%$ ) than that of d2 PI.

143 **day 14 PI** About the same amount of variance in the unweighted Unifrac distances was accounted  
144 by the **diet** across the **ileum, caecum, and colon** at d14 PI ( $R^2=14.2\%$ ), whereas the **litter**  
145 **was not** a statistically significant **predictor** of the variance at that time point.

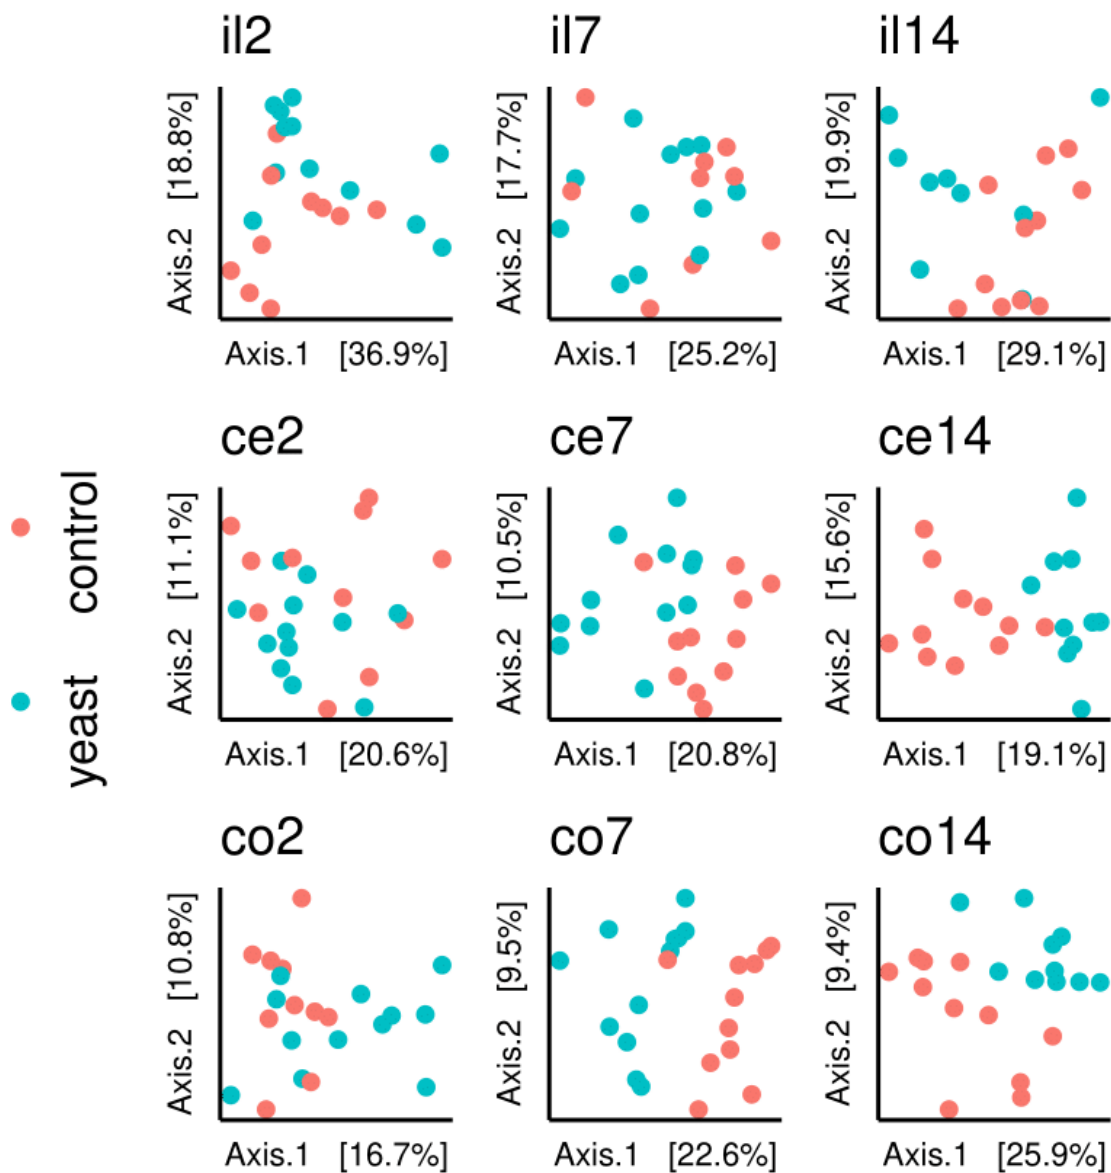

Figure 5: Beta microbial diversity. Principal coordinate analysis plot of the pig gut microbiotas coloured by diet (yeast, *blue*, control, *red*). The panel names designate distinct microbiomes across gut sites and time (ileum, *il*, caecum, *ce*, colon, *co* in combination with d2 PI, 2, d7 PI, 7, d14 PI, 14

### 146 3.3.4 Differential abundance test

147 **3.3.4.1 Ileum** Two days after the challenge (d2 PI) there were more *Clostridia* class in the  
148 ileum microbiome of the control piglets compared with that of the yeast piglets. *Bacilli*, in  
149 contrast, were more predominant in the microbiome of the yeast fed piglets compared with  
150 that of the control (Figure 6). At a higher taxonomic resolution, a *Lactobacillus* cluster (sp.  
151 *reuteri*, *mucosae*, and *salivarius*) and *Streptococcus luteciae* were more predominant in the yeast  
152 microbiomes, while *Sarcina* and *Clostridium* sp. G060 were more predominant in the microbiomes  
153 of the control fed piglets.

154 At d7 PI, the differential abundance of *Clostridia* and *Bacilli* bacterial classes was similar to  
155 the differential abundance at d2 PI (above). *Gammaproteobacteria* were more abundant in the  
156 microbiomes of the ileum of yeast-fed piglets compared to those of the control-fed piglets (Figure  
157 6). More specifically, *E. coli*, *Streptococcus luteciae*, *Veilonella dispar*, *Actinobacillus* unclassified.,  
158 *Actinobacillus porcinus*, and Pasteurellaceae ASVs were differentially abundant in the yeast-fed  
159 microbiomes of the ileum. Of note, *Clostridium perfringens* was more predominant in the ileum  
160 of the control diet-fed piglets.

161 At d14 PI, there again were more *Clostridia* class and less *Proteobacteria*, *Actinobacteria*, and  
162 *Gammaproteobacteria* bacterial classes in the control-fed ileum microbiomes compared with those  
163 of the yeast-fed piglets (Figure 6). At the family level, there were more Enterobacteriaceae,  
164 Streptococcaceae, Veillonellaceae, and Pasteurellaceae and less Clostridiaceae in the microbiomes  
165 of the yeast-fed piglets than those of the control piglets.

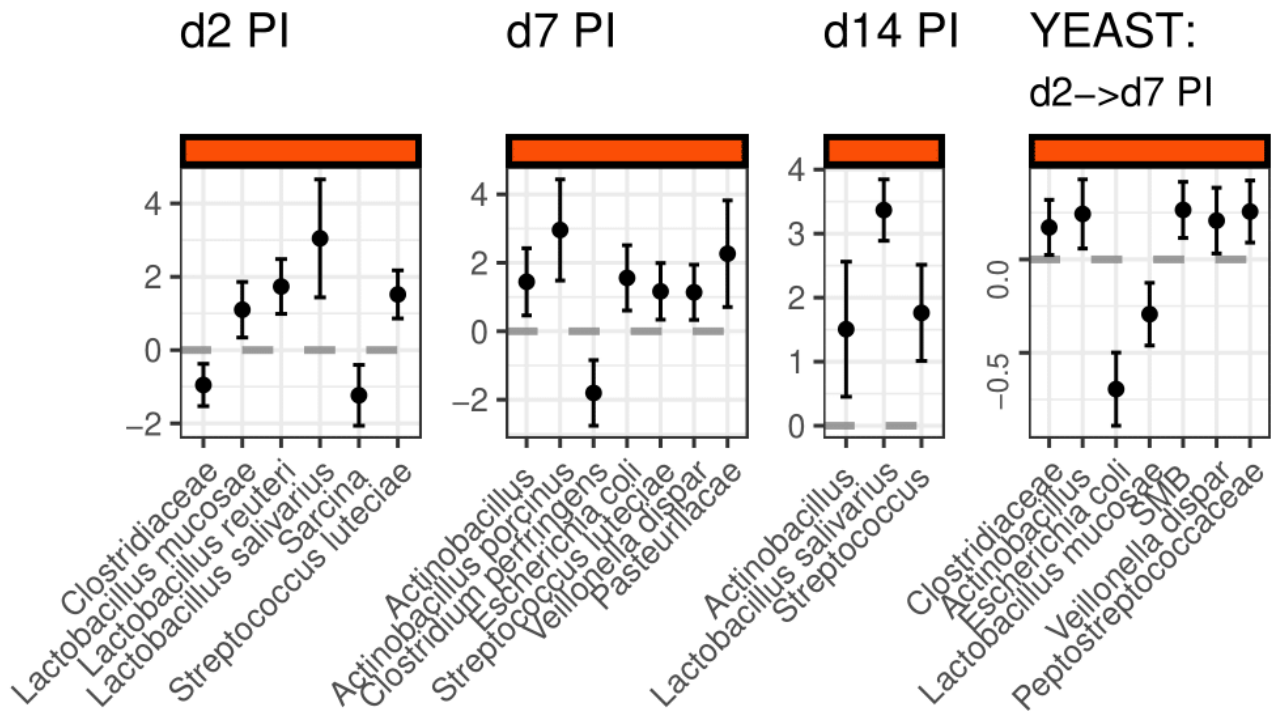

Figure 6: Differentially abundant taxa in the ileum (species level). The dots with the intervals represent the estimates of the beta-binomial regression model of the porcine faecal microbiomes along with its standard errors across d2-d14 PI; the positive estimates (above the grey dashed line, "0") indicate the taxa that are more predominant in microbiomes of the piglets fed the yeast diet compared with those fed the control diet. The *YEAST* panel shows differentially abundant taxa between the microbiomes of the yeast fed piglets at d2 and d7 PI; the positive estimates (above the grey dashed line, "0") indicate the taxa that are more predominant in microbiomes of the pigs on d7 PI in comparison with abundance on d2 PI

166 **3.3.4.2 Caecum** At d2 PI there were more *Streptococcus luteciae*, Paraprevotellaceae  
167 (CF231), and *Parabacteroides* taxa in the caecal microbiomes of yeast-fed piglets than in those  
168 of the control diet (Figure 7). At d7 PI the relative abundance of *Proteobacteria*, *Firmicutes*,  
169 *Deferribacteres*, *Actinobacteria*, and *Tenericutes* phyla were higher in the control fed piglet  
170 caecum microbiomes compared with those of the yeast (Figure 7). The only phylum that  
171 was more predominant in the yeast group caecum microbiomes than that of the control was  
172 *Bacteroidetes*. As many as 36 taxa were more predominant in the control fed piglet caecum  
173 microbiota compared with 2 taxa in that of the yeast (Figure 7).

174 At d14 PI, the relative abundance of bacterial classes *Deltaproteobacteria* and *Erysipelotrichi*  
175 was differentially abundant in the yeast-fed piglet caecum microbiomes compared with those  
176 of the control-fed piglets. In contrast, *Epsilonproteobacteria* relative abundance was higher in  
177 the control-fed piglet caecum microbiomes compared with those of the yeast-fed piglets. At the  
178 species taxonomic level, there were 10 differentially abundant taxa in the control-fed caecum  
179 microbiomes compared with 11 of those in the yeast-fed piglets (Figure 7).

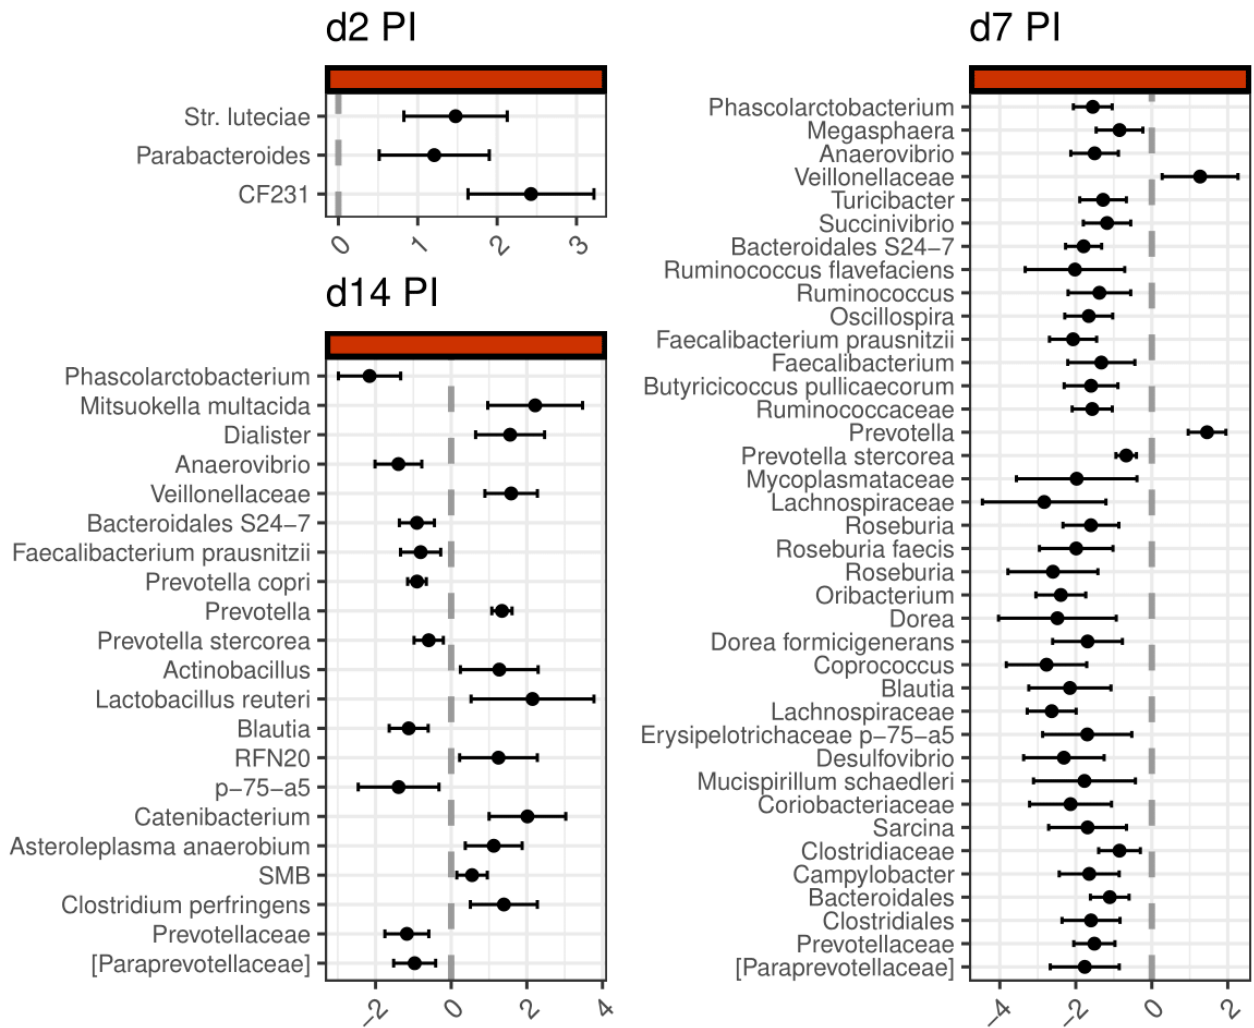

Figure 7: Differentially abundant taxa in the caecum (species level). The dots with the intervals represent the estimates of the beta-binomial regression model along with its standard errors across d2-d14 PI; the positive estimates (right of the grey dashed line) indicate the taxa that are more predominant in the microbiomes of yeast-fed piglets compared with those of the control-fed piglets

180 **3.3.4.3 Colon** At d2 PI, there more *Parabacteroides*, Paraprevotellaceae, Ruminococcaceae,  
181 and *Novispirillum* affiliated ASVs in the yeast fed piglet colon microbiomes than in those of the  
182 control-fed piglets. The relative abundances of *Campylobacter*, *Prevotella*, and *Desulfovibrio* were  
183 higher in the colon microbiomes of the control fed piglets compared with those of the yeast-fed  
184 piglets (Figure 8). At the species level of analysis, the relative abundances of *E. coli*, *L. johnsonii*,  
185 and *P. copri* were differentially abundant in the colon of control-fed piglets compared with those  
186 of the yeast-fed piglets (Figure 8).

187 At d7 PI, the relative abundance of *Proteobacteria*, *Firmicutes*, *Spirochaetes*, *Deferribacteres*,  
188 *Actinobacteria*, and *Tenericutes* phyla was higher in the control fed piglet colon microbiomes  
189 compared with those of the yeast-fed piglets. *Bacteroidetes* and *Elusimicrobia* phyla were  
190 more predominant in the yeast-fed colon microbiomes than those of the control-fed piglets. At  
191 the species level, there were 48 differentially abundant ASVs in the colon microbiomes of the  
192 control-fed piglets and only 5 of those in the colon microbiomes of the yeast-fed piglets (Figure  
193 8).

194 At d14 PI, the relative abundance of the bacterial phyla *Firmicutes* and *Tenericutes* was  
195 differentially abundant in the control-fed piglet colon microbiomes compared with those of the  
196 yeast-fed piglets. In contrast, *Bacteroidetes* phyla relative abundance was higher in the yeast-fed  
197 piglet colon microbiomes compared to those of the control-fed piglets. At the species level, there  
198 were 32 differentially abundant taxa in the control-fed piglet colon microbiomes compared with  
199 5 of those in the yeast-fed piglet colon microbiomes (Figure 8).

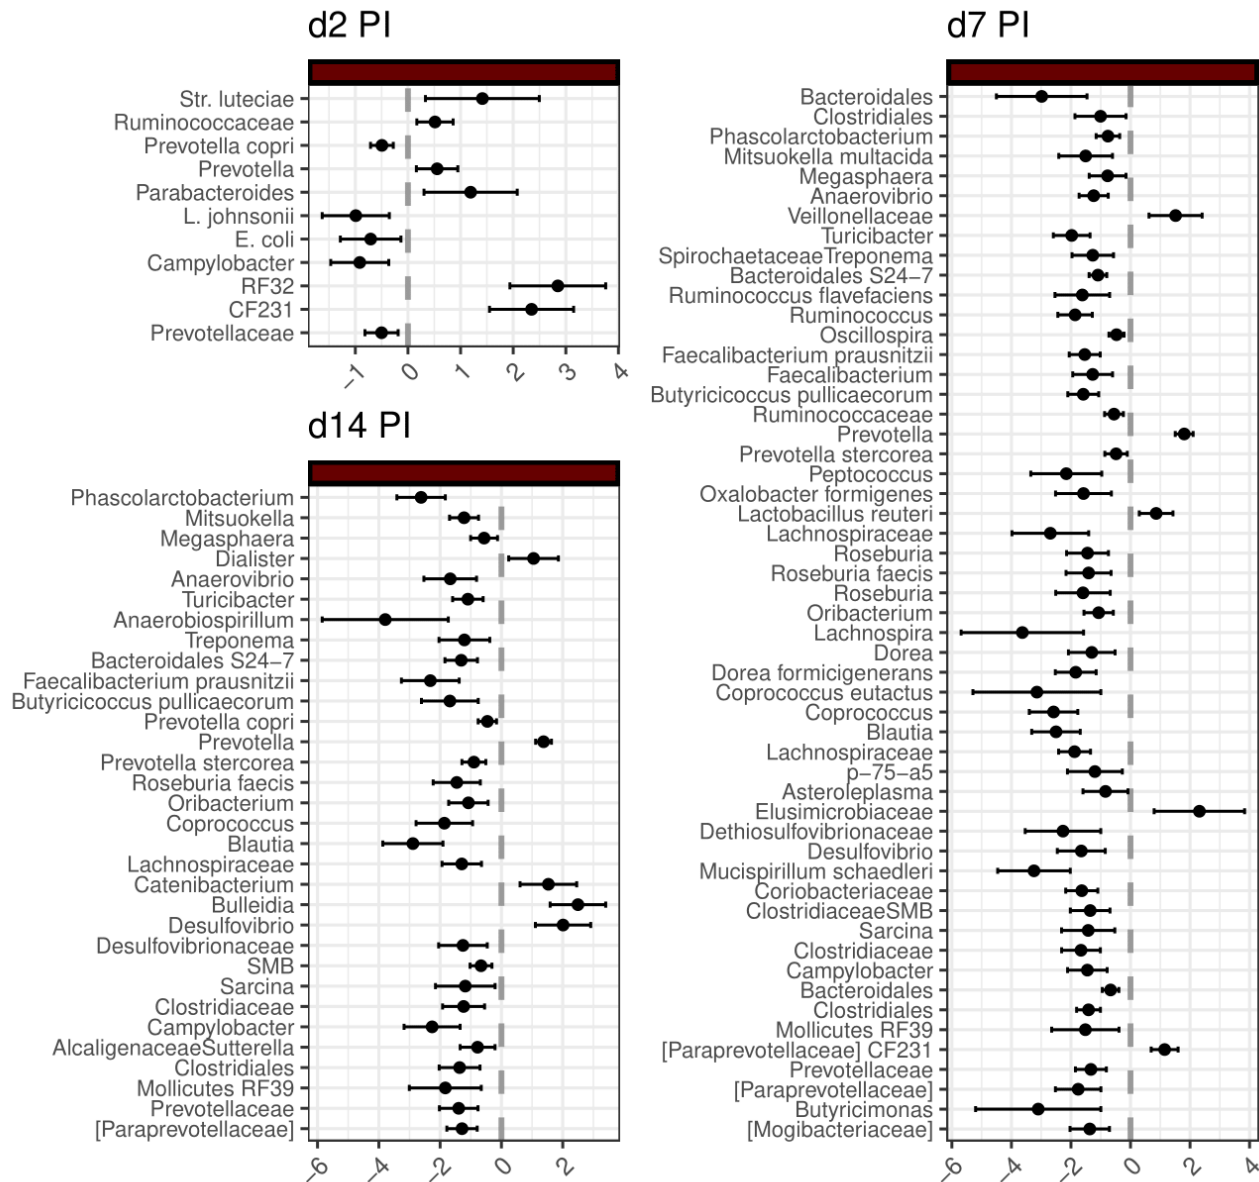

Figure 8: Differentially abundant taxa in the colon (species level)\*\* The dots with the intervals represent the estimates of the beta-binomial regression model along with its standard errors across d2-d14 PI; the positive estimates (right of the grey dashed line) indicate the taxa that are more predominant in the microbiomes of yeast-fed piglets compared with those of the control-fed piglets



### 3.4 Microbial network analysis

To characterize further the microbial communities that reside in the small intestine, microbial networks were recovered with the Sparse Inverse Covariance Estimation for Ecological Association Inference approach (SPIEC-EASI) algorithm (see material and methods).

The connectivity in the microbial communities of the ileum of the challenged pigs was sparse irrespective of time. Among the connected nodes, lactobacilli formed cliques more often than other phylotypes. Three members of the yeast fed pig microbiome lactobacilli, *L. mucosae*, *L. reuteri*, and *L. johnsonii*, were connected on d2 PI and d14 PI (Figure 9). *L. mucosae* which decreased in numbers in the digesta of the yeast-fed piglets (Figure 6), became disconnected from the lactobacilli clique on d7 PI (Figure 9). Lactobacilli of the control fed pig microbiomes formed bipartite cliques on d2 and d7 PI which consisted of *L. reuteri* and *L. johnsonii*. On d 14 PI these two species were not connected (Figure 9)

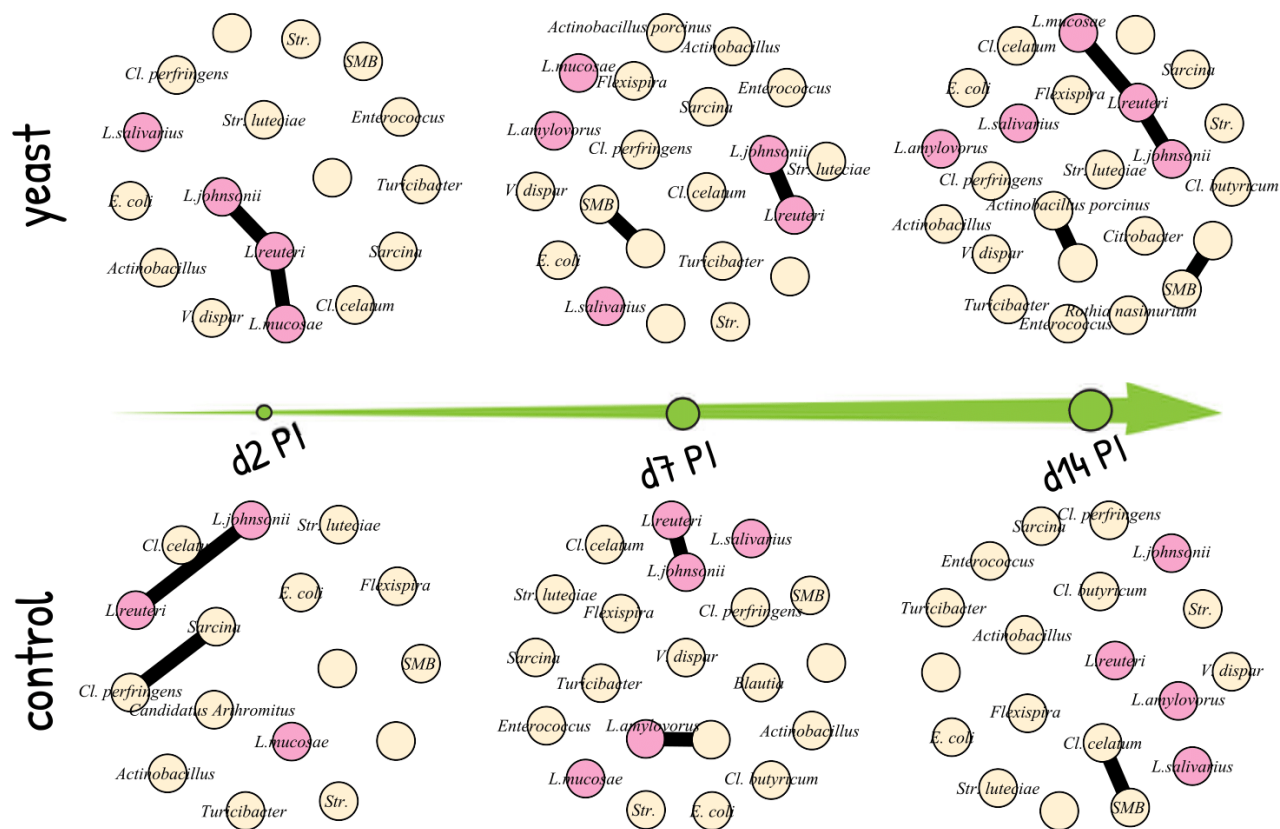

Figure 9: Microbial network of the ileum microbiomes across time and feeding groups. *Lactobacillus* genus is coloured pink, while other taxa are coloured in beige. The nodes (coloured circles) represent ASVs, while the black coloured lines represent connections between the nodes.

## 212 4 Discussion

213 This study investigated the impact of a novel yeast diet on weaner pig immunity assessed in  
214 the context of the intestinal microbiome and health parameters. The yeast diet contained  
215 beta-glucans and mannans as the structural components of yeast cell walls. Beta-glucans and  
216 mannans are believed to possess immunomodulatory properties when supplied to human and  
217 other mammals (reviewed in [24, 25]). In this study knowledge about the purity, quantity,  
218 and bioavailability of these compounds is limited. The heat deactivated *C. jadinii* yeast cells  
219 replaced 40% of crude proteins in the diet. The high dietary inclusion level suggests that large  
220 amounts of the immunomodulatory compounds were readily available to the weaned piglets  
221 through the experimental diet. A study by Håkenåsen et al. in healthy piglets fed a similar yeast  
222 diet demonstrated changes in the immune response in the small intestines by utilizing RNA  
223 sequencing analysis. Their findings featured an upregulation of immune signalling pathways,  
224 NF- $\kappa$ B and Toll-like receptors, already at d7 PW in the yeast-fed animals [26]. Lagos and  
225 co-workers showed that the *C. jadinii* yeast diet was associated with an increased CD3<sup>-</sup>/CD8<sup>+</sup>  
226 cell population in distal jejunal lymph-nodes at d28 PW. However, the authors did not find this  
227 association in the blood [27].

228 In contrast to the studies of Håkenåsen et al. and Lagos et al., the present study employed an *E.*  
229 *coli* infection model to elicit changes in the immune response that are attributable to the yeast  
230 diet and were not evident in the healthy animal experiments. The choice of the challenge strain  
231 (F4ab) used in this study was guided by the relevance of that pathotype for the Norwegian and  
232 European swine industry [2, 6, 28]. Once established in a pig farm, the pathogen can remain  
233 in the environment for a long time and is hard to eradicate [1, 29]. Another important aspect  
234 of this bacterium is that suckling piglets are mostly immune to the infection through colostrum  
235 and milk from vaccinated mothers. Sow vaccination shifts the adhesive *E. coli* disease onset  
236 to the post-weaning period where piglet mortality due to PWD is lower compared with that  
237 of neonates [3, 4]. The reduced growth of the animals due to PWD, however, may be relevant  
238 for the industry. From the experimental point of view, this infection model was an appropriate  
239 replication of the field disease as the induced infection caused no mortality.

240 The degree of adhesiveness of F4<sup>+</sup> *E.coli* to porcine enterocytes and subsequently the rate of  
241 bacterial colonisation is determined by the genetic constitution of the pigs. One such genetic

242 determinants is an SNP located in the *muc4* gene of porcine chromosome 13. Others have  
243 suggested that additional SNP candidates are implicated in F4 susceptibility adhesion porcine  
244 phenotypes [11]. To our knowledge, the only DNA based assay that can discriminate between the  
245 adhesive and non-adhesive porcine phenotypes is the one developed by Jørgensen and colleagues  
246 [8]. The present study involved two principally distinct herds: one with a history of PWD  
247 (F4-immune) and another without a history of PWD (F4-naive). The F4-immune phenotype of  
248 the pig herds was supported by DNA testing. There were 19 animals in the F4-immune herd  
249 that had a mutant allele within the *muc4* gene compared with none in the F4-naive herd. Our  
250 observations of diarrhoea severity due to F4 *E. coli* supported the genotyping results related to  
251 F4 susceptibility. The diarrhoea scores were higher in the F4 naive herd piglets from d1 PI to  
252 d3 PI. This time-window corresponds to the classical development of PWD [20, 30]. The faecal  
253 scores in the F4-immune herd were only slightly elevated post-infection. Feed intake figures also  
254 highlighted a lower severity of PWD in the F4-immune herd than that in the F4-naive herd.  
255 After the acute phase of the ETEC infection, on d4 PI, the F4-immune piglets were eating more  
256 and gaining more weight compared with the F4-naive piglets. One of the key findings in the  
257 present study was that the yeast-fed piglets were eating less and subsequently gaining less weight  
258 d14 PI than the control-fed piglets. Unlike the figures at d7 PI, the effect of F4 susceptibility on  
259 the feed intake and ADG was not pronounced. These findings contrast with previous studies in  
260 healthy piglets where feed intake was comparable between yeast-fed and control-fed pigs [26, 31].

261 The implications of appetite loss in yeast-fed animals challenged with a pathogen are unclear. To  
262 our knowledge, PWD-affected piglets recover well, and there was no production loss due to the  
263 disease on the farm with a history of PWD (the National litter recording system, “Ingris”). It has  
264 been proposed that reduced appetite is an adaptation trait which, in concert with the immune  
265 response, helps mammals survive enteric infections [32]. Murray and colleagues demonstrated  
266 that food avoidance in mice infected with *Listeria monocytogenes* resulted in 50% less mortality  
267 compared with the infected force-fed mice [32]. Wang and co-workers [33] obtained similar results  
268 by reproducing the experiment by Murray and colleagues [32]. The listeriosis and colibacillosis  
269 infection models are not directly comparable concerning the mortality/morbidity rates. The  
270 design of this study precludes us from making assumptions on how herds without a history  
271 of PWD would fare after being exposed to PWD. However, here we can speculate that the  
272 development of appetite loss in the yeast-fed piglets might render pigs more robust against

273 possible subsequent infectious stressor. A longitudinal study design, or a field trial, is essential  
274 to address this research question.

275 While changes in appetite were observed towards the end of the experiment, changes in the  
276 distribution of immune cell populations were already visible at d2 PI. There was an inverse  
277 relationship between the intraepithelial CD3 populations located in the ileum and the degree of  
278 F4<sup>+</sup> *E. coli* colonisation in the control-fed piglets. In contrast, this relationship was not present  
279 in the yeast-fed piglets. This finding suggests that the yeast diet enabled intraepithelial T cell  
280 populations to persist in the presence of high levels of mucosa-associated F4<sup>+</sup> *E. coli*.

281 Our results corroborate and elaborate on the findings of differences in the immune gene expression  
282 in the porcine small intestine reported by Håkenåsen et al. [26]. These investigators demonstrated  
283 that on day 7 after the introduction of yeast-based feed, several immune system pathways,  
284 including Toll-like receptor and NF- $\kappa$ B signalling pathways, were enriched in the small  
285 intestine of the animals. High inclusion levels of immunomodulatory yeast compounds in diets  
286 likely stimulates small intestine immunity.

287 It is our speculation that the immune system was (I) modulated prior to the infection either  
288 by the immunogenic compounds of the yeast cell walls or shifts in small intestine microbial  
289 communities or both and then (II) exposed to antigenic stimuli due to the ETEC infection. This  
290 speculation is encouraged by our observations of higher counts of F4<sup>+</sup> *E. coli* in the F4-naive  
291 herd compared with those of F4-immune herd on the yeast diet. In other words, the growth of  
292 intestinal ETEC was suppressed in the pigs from the herd with a history of PWD.

293 These findings indicate the presence of an effect of the yeast diet on the local immune  
294 response and, later, on appetite. Hoytema van Konijnenburg et al. using a murine model  
295 showed that intestinal intraepithelial lymphocytes (IELs) movements within the epithelium  
296 are antigen-specific[34]. The authors demonstrated using live imaging that the IELs increased  
297 their motility within the epithelial cell layer (“flossing”) when exposed to *Salmonella enterica*  
298 antigens. Also, they found that in the absence of pathogen (specific pathogen-free mice) in  
299 the lumen the movement of IELs was reduced compared to that of the infected animals. It is  
300 difficult to compare our immunohistochemical study to the live cell imaging reported in the  
301 work of Hoytema van Konijnenburg and colleagues. While more CD3<sup>+</sup> cells were associated  
302 with fewer F4<sup>+</sup> in the control diet-fed pigs and a similar association was not observed in the  
303 yeast-fed pigs, a detailed investigation of the dynamics of IEL CD3<sup>+</sup> cells in the small intestine

304 during ETEC infection was not performed. It was also beyond the scope of this work to examine  
305 the distribution of T cell subpopulations within in the epithelium. It would be interesting  
306 to elaborate our preliminary findings to perform a more detailed characterisation of the IEL  
307 CD3<sup>+</sup> cells using this infection model.

308 The gut microbial ecology findings suggest that the pigs may have developed valuable traits after  
309 the exposure to the yeast diet and the bacterial challenge. The divergence of gastrointestinal  
310 microbiomes over the course of the ETEC infection was quite distinct for pigs fed either  
311 the control or yeast diet. On the second day after the ETEC challenge, the small intestine  
312 microbiomes of the yeast fed piglets were more diverse with a co-occurrence between *L. johnsonii*  
313 and *L. reuteri*, and *L. reuteri* and *L. mucosae*. In addition, *L. reuteri*, *L. mucosae*, and *L.*  
314 *salivarius* were differentially abundant in the yeast fed pig ileum microbiomes on the second  
315 day after the ETEC challenge. No major differences in the large intestine microbiomes were  
316 identified on the same day. An exception was higher relative abundance of *Str. luteciae* which  
317 was present across the ileum, caecum, and colon microbiomes of piglets fed yeast compared with  
318 that of the control-fed piglets. The data obtained by Yang and co-workers suggested that *Str.*  
319 *luteciae* was one of the bacterial phlotypes that was more predominant in the healthy piglet  
320 faecal microbiomes compared with those of the piglets with diarrhoea (Yang2017). We could  
321 not test this trend on our data since the diarrhoea scoring was performed at a group level.

322 The transition of the gut microbiomes of piglets fed the yeast diet from d2 to d14 PI was  
323 characterized by an increase in alpha diversity of the small intestine microbiome compared with  
324 those of the control fed piglets. While various phlotypes increased in numbers in the small  
325 intestine, the caecum and colon microbiomes of pigs fed the yeast diet were distinct from those  
326 of the control diet on d7 PI. A marked drop in a number of bacterial phlotypes, including  
327 various dietary fibre degraders (Figure 7, Figure 8), on d7 PI in the yeast-fed piglet large intestine  
328 microbiomes coincided with the loss of co-occurrence of *L. reuteri* and *L. mucosae* in the ileum  
329 microbial networks. Interestingly, a decrease in *E. coli* coincided with a decrease on d 7 PI in *L.*  
330 *mucosae* in the ileum of piglets fed yeast compared with that of d2 PI. This may suggest that  
331 the clearance of the pathogen by the immune system also targeted *L. mucosae*. In contrast, the  
332 populations of host-adapted *L. reuteri* and *L. johnsonii* [35, 36] were neither changed in size nor  
333 was their co-occurrence pattern disturbed.

334 When the co-occurrence of *L. mucosae* and *L. reuteri* was re-instated on d14 PI, the caecum, but

335 not the colon, microbiomes of the piglets fed the yeast diet became more balanced in terms of the  
336 differentially abundant phylotypes (Figure 7, Figure 8, Figure 9). The presence of the lactobacilli  
337 co-occurrence cluster was another distinct feature of the ileum microbial communities of the  
338 yeast-fed piglets. This sub-community was more pronounced in the yeast-fed piglet microbiomes.  
339 This distinction in microbial communities may be attributed to the principal differences in the  
340 feed formulation. Intact *C. jadinii* yeast cells were fed to animals that cannot enzymatically break  
341 down the yeast cell wall components (chitin, mannan-proteins, and yeast beta-glucans). To our  
342 knowledge, the ileal digestibility of the yeast feed proteins in weaner piglets is on a par, or higher  
343 than that of the proteins from control diets [26, 31]. This means that yeast cell wall disruption  
344 is necessary to make yeast intracellular nutrients available for host degradation/uptake. We  
345 previously showed that there were more lactobacilli in the small intestine of the yeast-fed healthy  
346 piglets compared with that of the control-fed piglets [21]. In the present study, we have also  
347 found higher lactobacilli in the ileum and co-occurrence of *L. reuteri* and *L. johnsonii*, and *L.*  
348 *johnsonii* and *L. mucosae* in the yeast-fed piglet gut microbiomes. This consistency in identifying  
349 more lactobacilli in the small intestine of piglets fed yeast identifies these bacteria as suitable  
350 candidates that are instrumental in degrading yeast cell walls. Tannock et al. demonstrated that  
351 *L. johnsonii* and *L. reuteri* could co-exist *in vitro*, and in the mouse forestomach. Also, the  
352 authors showed that the two strains could adapt nutrient utilization mechanisms depending on  
353 whether the strains were alone or in a co-culture. These two lactobacilli strains can degrade mono-  
354 and oligosaccharides via several alternative pathways [37, 38]. However, to degrade complex  
355 carbohydrates, the bacteria may be obliged to act in concert to maximize nutrient utilization.  
356 *In-silico* analysis of a published porcine gut metagenome database [39] shows that *L. johnsonii*  
357 can produce mannan endo-1,4-beta-mannosidase, while *L. reuteri* seems to lack the gene. This  
358 enzyme may be operative in the degradation of the yeast cell wall mannan-protein complex.

359 Charlet and co-workers demonstrated under laboratory conditions that *L. johnsonii* was able  
360 to inhibit the growth of live *Candida glabrata* and *Candida albicans* by exerting a chitinase-like  
361 activity [40]. The analysis of porcine metagenomic assemblies [39] revealed that both *L. johnsonii*  
362 and *L. reuteri* had a gene encoding a LysM domain which is operative in chitin-binding (reviewed  
363 in [41]). While both strains can theoretically bind to the yeast cell walls, only *L. johnsonii*  
364 seemed to carry chitinase encoding determinants (GH 18). Based on the existing knowledge and  
365 our findings, we argue that yeast cells in the feed undergo lactobacilli microbial degradation in



366 the small intestine. We were able to recover a stable connection between *L. johnsonii* and *L.*  
367 *reuteri* from all ileal microbiomes except on d14 PI in the control group using the SPIEC-EASI  
368 algorithm.

369 The two lactobacilli strains are known to be able to colonize non-secretory epithelia and co-exist  
370 in biofilms in the alimentary tract of mammals [36, 38].

371 Based on co-occurrence patterns, our analysis suggests that a distinct lactobacilli phylotype, *L.*  
372 *mucosae*, is the third member of the lactobacilli cluster. As all three strains adhere to surfaces  
373 and form biofilms [36, 42], we speculate that these lactobacilli cooperate in degrading the yeast  
374 cell wall. In support of this notion, *L. mucosae* was never connected to *L. johnsonii* in the  
375 microbiomes of piglets fed diets that did not contain the yeast cell substrate. To pursue this  
376 notion further, the microscopy of gastrointestinal tract digesta with lactobacillus species-specific  
377 labelling may be useful. Our speculation on the possible role of lactobacillus species could  
378 be relevant to animal welfare. Lactobacilli are generally thought to be beneficial bacteria of  
379 gastrointestinal tract. Since the *C. jadinii* yeast-derived diet can both fulfil nutritional needs  
380 of the animals and possibly augment lactobacilli group, the novel yeast diet could enhance the  
381 immunity of the animals. In this study, we have demonstrated that yeast-fed piglets showed loss  
382 of appetite. This is an evolutionary adaptation that helps animals withstand life-threatening  
383 bacterial infections [32, 33].

384 Although it is beyond the scope of this work to study the mechanism of appetite loss, we do  
385 not exclude possibility of a complementary effect of yeast immunomodulatory components and  
386 intestinal lactobacilli to play a key role. A higher microbial diversity in the small intestine  
387 may indicate higher tolerance levels of gut immunity. We also speculate that higher microbial  
388 diversity of the ileal microbiomes and caecal microbiomes at d14 PI were linked. It is conceivable  
389 that richer microbial communities at d14 PI in the ileum are a function of evolved immunologic  
390 resilience boosted by the immunogenic properties of yeast. However, further studies are needed  
391 to clarify this suggested interaction.

392 Previous studies have provided evidence that the novel yeast-based diet can support healthy  
393 piglets. Irrespective of whether the immune modulation by the yeast diet occurs due to the  
394 direct stimulation of the immune system by the yeast beta-glucans and mannans or the indirect  
395 stimulation via small intestine lactobacilli growth promotion, or both, the present study shows

396 that the novel diet can improve the health of diseased piglets in herds with a PWD history.  
397 However, the response to such diets on the farm is not always comparable to that under controlled  
398 experimental conditions. Furthermore, the immunomodulatory properties of yeast are dependent  
399 on the species of yeast and down-stream processing conditions of the yeast [43]. Future work  
400 should investigate the effect of yeast strain and down-stream processing on nutritional value and  
401 health beneficial effects of yeast, and also assess the performance of novel yeast diets under field  
402 conditions.

## 403 **5 Ethics statement**

404 The animal study was conducted in compliance with the Norwegian Animal Welfare Act  
405 10/07/2009 and the EU Directive on the Protection of Animals used for Scientific Purposes  
406 (2010/63/EU). Norwegian Food Safety Authority approved the use of animals under FOTS ID  
407 16510 protocol.

## 408 **6 Acknowledgements**

409 We thank the Bacteriology group at the Department of Food Safety and Infection Biology at  
410 Norwegian University of Life Sciences for their support during sampling. We are grateful to  
411 the Histology group at the Department of Basic Sciences and Aquatic Medicine at Norwegian  
412 University of Life Sciences for their contribution during sampling and histology analysis. We  
413 also thank the staff at the Centre for livestock production (SHF) (NMBU, Ås) and Faculty  
414 of Veterinary Medicine, the Department of Production Animal Clinical Sciences (PRODMED)  
415 for their excellence in managing the animals during this experiment. Lars Johan Kalager is  
416 acknowledged for his help and valuable contributions to this study.



## 417 7 Methods

### 418 7.1 Isolation and characterisation of the challenge *E. coli*

419 The bacterial strain was isolated from a diarrhoea sample of a 31 day old weaner (2 days  
420 post-weaning) piglet from a farm with a history of post-weaning diarrhoea (PWD) (described  
421 below). The isolate was cultured on blood agar followed by a morphological examination. The  
422 bacterial strain was identified as a haemolytic *Escherichia coli* positive for F4 fimbrial antigen as  
423 per result of F4(K88) F monovalent rabbit antiserum assay (Statens serum institut, Copenhagen,  
424 Denmark). Neo-Sensitabs disc-diffusion antimicrobial susceptibility testing assay(A/S Rosco  
425 Diagnostica, Taastrup, Denmark) categorized the strain as being resistant to penicillin, fusidic  
426 acid, and streptomycin.

427 The isolate was propagated on blood agar plate at 37°C for 24 hours. DNA was extracted  
428 using a phenol-chloroform method ([https://www.pacb.com/wp-content/uploads/2015/09/  
429 SharedProtocol-Extracting-DNA-usinig-Phenol-Chloroform.pdf](https://www.pacb.com/wp-content/uploads/2015/09/SharedProtocol-Extracting-DNA-usinig-Phenol-Chloroform.pdf)). The short-read sequencing  
430 data were obtained from the Norwegian Veterinary Institute Sequencing unit (SEQ-TECH,  
431 VI) (Nextera Flex library prep protocol, Illumina MiSeq 300 bp pair-end sequencing). The  
432 long-read data were obtained from Nanopore MinION platform (SQK-RAD004 library  
433 prep protocol). Short and long sequencing reads were quality filtered using bbdduk version  
434 37.48 (BBMap – Bushnell B., 395 <https://sourceforge.net/projects/bbmap/>) and Filtlong  
435 v0.2.0 (<https://github.com/rrwick/Filtlong>), respectively. A hybrid (short and long reads)  
436 whole-genome assembly was obtained with Unicycler v0.4.8 [44]. The sequenced *E. coli*  
437 shared 93.21% genome with *E. coli* UMNK88 NC 017641 (99.81 average nucleotide identity)  
438 as per the analysis of the assembled genome using MiGA web-server [45]. Virulence  
439 genes of the sequenced *E. coli* were identified using VirulenceFinder 2.0 web-server [46]  
440 (<https://cge.cbs.dtu.dk/services/VirulenceFinder/>). Briefly, the isolate carried genes encoding  
441 following virulence determinants: K88/F4, EAST1, heat-labile enterotoxin, and heat-stable  
442 enterotoxin II. The assembled genome was deposited in ENA (ERS5259532).

## 443 7.2 Experimental design

444 In total, 68 pure Landrace piglets were used in the study. The animals originated from two  
445 farms: a) one with a history of recurrent post-weaning diarrhoea (PWD-immune herd,  $n = 32$ )  
446 and b) one free of PWD problems (PWD-naive,  $n = 36$ ). Multiparous sows were given “Porcilis  
447 Porcoli Diluvac Forte vet.” and “Porcilis Ery Parvo vet.” (MSD Animal Health, both) before  
448 farrowing as a routine vaccination procedure. At day 2 postnatal, piglet oral mucosal swabs  
449 were collected followed by DNA extraction using QIAamp DNA Mini Kit (QIAGEN, GmbH,  
450 Hilden, Germany). The animals were genotypically classified as being either homozygous  
451 ( $n=48$ ) or heterozygous ( $n=19$ ) susceptible to F4ac bacterial fimbria adhesion to enterocytes  
452 by a *muc4* gene polymorphism test described previously [8]. Briefly, a DNA fragment of the  
453 porcine *muc4* gene was PCR-amplified (primers: 5'-GTGCCTTGGGTGAGAGGTTA-3' and  
454 5'-CACTCTGCCGTTCTCTTTCC-3'), cleaned (NucleoSpin, Macherey-Nagel), and digested  
455 with *XbaI* restriction enzyme. The susceptible allele was considered if 151 and 216 bp digestion  
456 fragments were obtained. No digestion indicated the resistant allele. The piglets were weaned on  
457 day  $28 \pm 2$  postnatal (average weight of  $8.9 \pm 1.5$  kg) and transported to the research facility unit  
458 where the experiment took place. At weaning, piglets were randomly allocated to either yeast  
459 weaner diet or control weaner diet blocking by weight and litter. The resulting four groups,  
460 Yeast/PWD-immune, Yeast/PWD-naive, Control/PWD-immune, and Control/PWD-naive,  
461 were housed in 4 environmentally controlled pens with dry spruce wood chip bedding (1  
462 pen per each group). The bedding material was renewed twice a day. Feed and water were  
463 accessible ad libitum at all times. The diet ingredients and chemical composition are given in  
464 the supplementary data (Table 1). Piglets were weaned at 28 days of age. After priming to  
465 the weaner diets for one week, all piglets were orally inoculated with  $10^9$  CFU/ml (in 2 ml of  
466 Lysogeny broth) of F4-positive enterotoxigenic *E. coli*. Faecal swab samples were taken and  
467 cultured on blood agar plates to control for the shedding of the challenge strain before and after  
468 the inoculation. The animals were sacrificed on day 2, 7, and 14 post-infection (PI) followed by  
469 sampling.

### 470 **7.3 Sample collection**

471 Faecal score measurements were taken twice a day throughout the experiment. The faecal scoring  
472 system was adopted from [47] which ranged from 1 (firm and shaped) to 4 (watery). The faecal  
473 scores were calculated as a mean score per pen per day. Feed leftovers were weighted once a day  
474 prior to adding a new portion of the feed. Feed intake was calculated as follows:

$$475 \frac{(F - L)}{n}$$

476 ,where  $F$  is the total weight of feed in the feed dispenser on the day before (g),  $L$  is the weight  
477 of leftovers on the current day, (g), and  $n$  is the number of pigs per pen. Due to the pen level  
478 of both faecal scores and feed intake measurements, no statistical procedure was attempted,  
479 and the figures were compared directly. Piglets' body weight was taken at weaning, one-week  
480 post-weaning (PW), and at each sampling day for those animals who were euthanised to calculate  
481 average daily gain (ADG). ADG was calculated as follows:

$$482 ADG = \frac{(Ms - Mw)}{D}$$

483 ,where  $Ms$  is weight at sacrifice (kg),  $Mw$  is weight at weaning (kg), and  $D$  is the number of days  
484 weaning-to-sacrifice (days).

### 485 **7.4 Immunohistochemistry**

486 Formalin-fixed, paraffin-embedded (FFPE) tissues were cut into 4-micron thick sections and  
487 mounted on glass slides (SuperFrost Plus, Thermo Scientific™, Braunschweig, Germany) and  
488 stored at 4°C until staining. The slides were then incubated at 58°C for 30 min, deparaffinized in  
489 xylene and rehydrated in graded alcohols to distilled water. Before the labelling with the primary  
490 antibodies, heat-induced antigen retrieval was performed. For immunolabelling with CD3  
491 antibody, the slides were heated in a microwave in Tris-EDTA pH 9.1 buffer with the following  
492 steps, first heated to and held at 92°C for 5 min, thereafter the slides were kept in the heated  
493 buffer for 5 min. This cycle was repeated with change in the last step where the slides were kept  
494 in the heated buffer for 15 min. For immunolabelling with F4 antibody, the slides were heated in  
495 an autoclave at 121°C for 10 min in 0.01M, pH6 citrate buffer. Endogenous peroxidase activity  
496 was inhibited with 3% H<sub>2</sub>O<sub>2</sub> in methanol for 10 min. Non-specific binding of primary antibody  
497 to tissue or Fc receptors was blocked by incubating the slides for 30 min in normal porcine serum  
498 at 1:100 in 5% bovine serum albumin (BSA) for CD3 staining and at 1:50 for 20 min for F4

499 staining. For labelling of T lymphocytes and Fimbrial adhesin F4, monoclonal anti-porcine CD3  
500 clone PPT3 (catalogue number 4510-01, Southern Biotechnology, Birmingham, USA) at 1:1200  
501 and polyclonal rabbit anti F4 (catalogue number 51172, Statens serum institut, Copenhagen,  
502 Denmark) at 1:400 were used. The slides were incubated at RT for 1 h, followed by 30 min  
503 incubation with secondary antibody. Sections labelled for F4 were incubated with secondary  
504 antibody from kit polymer-HRP anti-rabbit (Dako En Vision+ System-HRP, Dako, Glostrup,  
505 Denmark) while sections labelled for CD3 were incubated with anti-mouse biotinylated secondary  
506 antibody (catalogue number BA-2000-1.5 Vector Laboratories, California, United States) at 1:50  
507 with 1% BSA and thereafter incubated with Vectastain Elite ABC reagent (Vectastain Elite ABC  
508 Kit, Vector Laboratories). Detection of peroxidase activity in the F4 and CD3 slides was detected  
509 with AEC + substrate from Dako En Vision+ System-HRP and ImmPACT® AEC Substrate,  
510 Peroxidase (HRP) (Vector Laboratories), respectively. For counterstaining, hematoxylin was  
511 used and as mounting media Aquatex (Merck, Darmstadt, Germany) was used. For enumeration  
512 of F4 and CD3 targets, QuPath, v0.2.3 was used (Bankhead2017). The region of interest (ROI)  
513 area was determined for F4 and CD3 and used as a reference for quantification: mucosa and  
514 the epithelium of four well-oriented villi, respectively. The detection of positive labelling was  
515 performed with the following parameters: Gaussian sigma = 2 um, hematoxylin threshold =  
516 0.4, eosin threshold = 0.3. There were three parameters estimated: 1) “F4 counts”, that is the  
517 proportion of the total number of mucosal surface-associated F4<sup>+</sup> *E. coli* positive staining to the  
518 mucosa ROI, 2) “F4 size”, that is the average size of the F4<sup>+</sup> *E. coli* positive staining areas, or  
519 colonies, per the whole area of the section, and 3) “IEL CD3”, that is the proportion of CD3  
520 positive staining per respective epithelial ROI.

## 521 **7.5 Microbial DNA sample handling**

522 At each of the sampling days, 5±1 pigs per pen (12±1 per diet) were euthanised by captive  
523 bolt stunning and pithing to allow the collection of gut contents for microbial ecology studies.  
524 Digesta from the ileum, caecum, and colon were snap-frozen in liquid nitrogen and stored at  
525 -80°C until DNA extraction. Total genomic DNA was extracted from 350 mg of ileum digesta  
526 by using QIAamp PowerFecal Pro DNA Kit according to the manufacturer’s instructions,  
527 except the samples were homogenized using a bead-beating step with zirconia/silica beads ( =

528 0.1 mm, Carl Roth, Karlsruhe, Germany) in TissueLyser II (Qiagen, Retsch GmbH, Hannover,  
529 Germany) with the following parameters: 1) pre-cooling of the TissueLyser adaptors down to  
530 0°C 2) bead-beating 1.5 min at 30 Hz. Total genomic DNA was extracted from 300 mg of  
531 the caecum and colon digesta by using QIAamp Fast DNA Stool Mini Kit according to the  
532 manufacturer's instructions, except the bead-beating step described above and digesting proteins  
533 with 30 L of Proteinase K II instead of 15-25 L suggested in the manufacturer's protocol.  
534 The purity of extracted DNA was quality controlled by NanoDrop (Thermo Fisher Scientific,  
535 Waltham, MA) followed by quantification by Qubit fluorometric broad range assay (Invitrogen,  
536 Eugene, OR, USA). Library preparation was performed at the Norwegian Sequencing Centre  
537 (<https://www.sequencing.uio.no/>, Oslo, Norway) using universal prokaryotic primers 319F  
538 (5'-ACTCCTACGGGAGGCAGCAG-3') and 806R (5'-GGACTACNVGGGTWTCTAAT-3')  
539 that amplify the V3-V4 hypervariable region of the 16S *rRNA* gene. Sequencing was performed  
540 on a MiSeq sequencer following the manufacturer's guidelines. The resulting demultiplexed  
541 raw sequences were deposited in the ENA (PRJEB41033).

## 542 **7.6 Bioinformatics analyses**

543 Demultiplexed paired-end Illumina reads were pre-filtered with bbdduk version 37.48 ([https://](https://sourceforge.net/projects/bbmap/)  
544 [sourceforge.net/projects/bbmap/](https://sourceforge.net/projects/bbmap/)) by trimming right-end bases less than 15 Phred quality score,  
545 removing trimmed reads shorter than 250 bp or/and average Phred quality score less than 20. The  
546 resulting reads were further quality filtered by trimming left-end 20 bp and removing reads with  
547 maxEE more than 1 for forward and 2 for reverse reads, denoised, merged, and chimera removed  
548 with DADA2 R package ver 1.12.1 [48] (Supplementary Figure 10). The resulting ASV tables  
549 that derived from two separate Illumina sequencing runs were merged followed by taxonomy  
550 assignment using RDP Naive Bayesian Classifier implementation in DADA2 R package (default  
551 settings) with GreenGenes database version 13.8, [49] as a reference database. The phylogenetic  
552 tree was reconstructed using phangorn R package ver. 2.5.3 [50] under the Jukes-Cantor (JC)  
553 nucleotide model with a gamma distribution ( $k=4$ ,  $\text{shape}=1$ ) with invariant sites ( $\text{inv}=0.2$ ).

554 DivNet R package [51] was used to estimate Shannon diversity and to test for differences  
555 in Shannon diversity estimates in networked gut microbial communities stratified by the day  
556 the samples were collected, the gut segment the samples were taken from, with the diet and

557 litter as covariates. Shannon entropy estimator of Phyloseq R package was used to calculate  
558 Shannon diversity point estimates. To estimate the Shannon diversity index and to compare it  
559 across the microbiomes of the pigs fed distinct diets, DivNet statistical procedure was used for  
560 each time point. The beta diversity analysis was performed via the analysis of multivariate  
561 homogeneity of group dispersions followed by the permutation test (9999 permutations) on  
562 unweighted Unifrac distances and principal coordinate analysis (PCoA) on unweighted Unifrac  
563 distances, and permutational multivariate analysis of variance (PERMANOVA) test in R, 9999  
564 permutations. The samples with the read count less than 40000 were discarded from the alpha  
565 and beta diversity analyses.

566 To calculate the relative abundance of bacterial phylotypes in the microbiomes of pigs across diets  
567 and time points, group means were taken from the respective groups. To detect differentially  
568 abundant bacterial phylotypes, ‘corncob’ algorithm [52] was run on the microbial feature tables  
569 (ASV counts per each sample) by fitting a beta-binomial regression model to microbial data for  
570 each time point with the diet and litter as covariates. Benjamini-Hochberg correction (cut-off  
571 of 0.05) was used to deal with the false discovery rate due to multiple testing. The test was  
572 run at each taxonomic level (phylum, class, order, family, species, and ASVs) discarding the  
573 samples with the read count less than 10000. Those ASVs lacking genus/species RDP-derived  
574 classifications were attempted to be classified manually by using web-based nucleotide BLAST  
575 on the non-redundant nucleotide database, where possible. Ambiguous hits were ignored.

## 576 **7.7 Microbial network analysis, ileum**

577 The ASV counts were agglomerated at the genus level and filtered for a minimum of 3 counts per  
578 ASV in at least 20% of the samples and at least 50% of the sample per time point (2, 7, 14 days  
579 PI) and diet (yeast diet and control diet) using the R package phyloseq version 1.26.1[53]. For  
580 each time point and diet, a network was computed on the ileum microbial data with SpiecEasi  
581 R package version 1.0.7 [54]. For each recovered network, the edges and nodes were inspected  
582 manually.

## 583 **7.8 Statistical analysis**

584 Except otherwise specified, the Bayesian generalized linear models with weakly informative priors  
585 were fitted through either bayestesteR v0.7.5 [55] or rstanarm v2.21.1 [56]. The results of the  
586 statistical analysis were given as a level of certainty of a certain even to be true given the model  
587 and available evidence.

## 588 8 Supplementary information

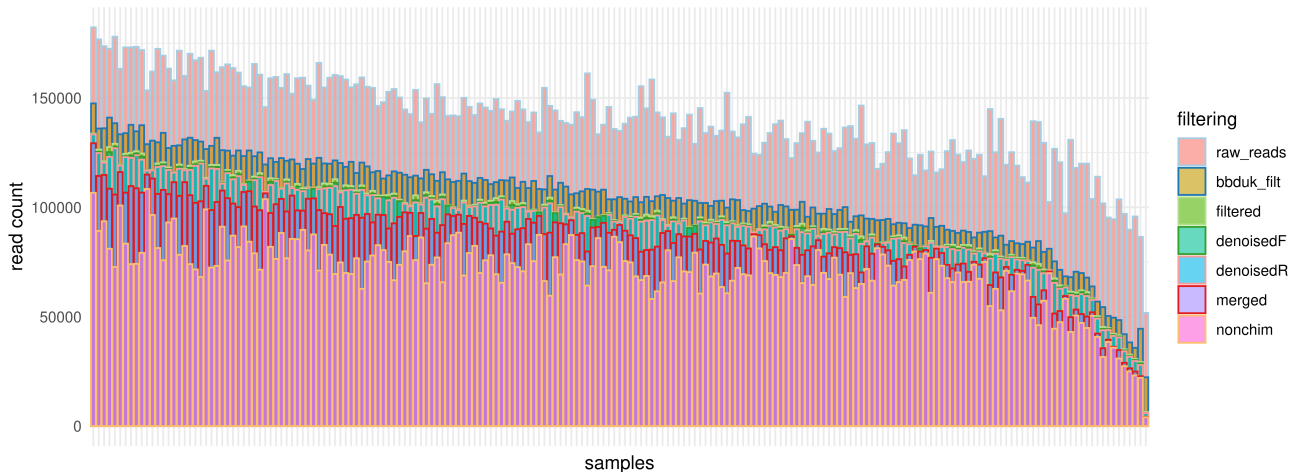

Figure 10: Summary of sequence processing pipeline. The bottom-most bar in the stack (nonchim) shows the number of read that were the basis for making the feature count table (OTU/ASV-table). The bars above nonchim summarise the number of sequencing reads removed at each bioinformatics pipeline step: a) filtered with the bbdduk filtering algorithm (*bbdukfilt*), b) filtered with the DADA2 algorithm (*filtered*), c) removed after DADA2 denoising step (*denoisedR/F*), d) removed due to pair merging failures (*merged*). *rawreads* are raw demultiplexed reads derived from Illumina sequencer.



Table 1: Piglet period. Ingredient and chemical composition (g/kg) of diets based on soybean meal (Control) and *C. jadinii* (Yeast). \* Premix : provided the following amounts per kilogram of feed: 120 mg of Zn (ZnO); 460 mg of Fe (FeSO<sub>4</sub> · H<sub>2</sub>O); 60 mg of Mn (MnO); 26 mg of Cu (CuSO<sub>4</sub> · 5H<sub>2</sub>O); 0.60 mg of I (Ca(IO<sub>3</sub>)<sub>2</sub>); <1.0 mg of Se (Na<sub>2</sub>SeO<sub>3</sub>); 8000 IU of vitamin A; 1500 IU of cholecalciferol; 45 mg of dl-alpha-tocopheryl acetate; 105 mg of ascorbic acid; 4.64 mg of menadione; 5.63 mg of riboflavin, 3 mg of thiamine; 15 mg of d-pantothenic acid; 20 ug of cyanocobalamine; 45 mg of niacin.

| Ingredients                               | Control piglet diet | Yeast piglet diet |
|-------------------------------------------|---------------------|-------------------|
| Wheat                                     | 627.9               | 593.6             |
| Barley                                    | 100                 | 100               |
| Oats                                      | 50                  | 50                |
| Yeast meal ( <i>C. jadinii</i> ) (47% CP) | 0                   | 146               |
| Soybean meal (SBM) (45% CP)               | 80                  | 19                |
| Fish meal (68.4% CP)                      | 20                  | 4.8               |
| Potato protein concentrate (72.5% CP)     | 33.8                | 9.1               |
| Rapeseed meal (Mestilla) (35%CP)          | 20                  | 4.9               |
| Rapeseed oil                              | 19.7                | 23.4              |
| Limestone                                 | 9.2                 | 9.4               |
| Monocalcium phosphate                     | 13.1                | 15.5              |
| Sodium chloride (NaCl)                    | 7.2                 | 5.5               |
| L-Lysine · HCl (98%)                      | 6.5                 | 5.7               |
| L-Threonine                               | 2.9                 | 2.4               |
| L-Methionine                              | 2.1                 | 2.9               |
| L-Valine                                  | 1.4                 | 1.2               |
| L-Tryptophan                              | 0.9                 | 0.9               |
| Premix*                                   | 5.3                 | 5.5               |
| Calculated contents                       | -                   | -                 |
| Net energy, MJ/kg                         | 9.94                | 9.94              |
| Crude protein from <i>C. jadinii</i> )    | 0                   | 40                |
| Analyzed content, g/kg                    | -                   | -                 |
| DM                                        | 869                 | 885               |
| Gross energy, MJ/kg                       | 19                  | 19                |
| Crude protein                             | 176                 | 172               |
| Crude fat                                 | 39                  | 41                |
| Ash                                       | 46                  | 45                |
| Neutral detergent fiber (NDF)             | 96                  | 91                |
| Starch                                    | 442                 | 437               |

| <b>cov</b> | <b>site</b> | <b>day</b> | <b>SumsOfSqs</b> | <b>MeanSqs</b> | <b>F.Model</b> | <b>R2</b> | <b>Pr(&gt;F)</b> |
|------------|-------------|------------|------------------|----------------|----------------|-----------|------------------|
| diet       | il          | 2          | 0.206            | 0.206          | 3.369          | 0.107     | 0.0048           |
| litter     | il          | 2          | 0.855            | 0.142          | 2.333          | 0.446     | 0.0011           |
| diet       | il          | 7          | 0.121            | 0.121          | 1.113          | 0.050     | 0.3306           |
| litter     | il          | 7          | 0.677            | 0.169          | 1.558          | 0.279     | 0.0228           |
| diet       | il          | 14         | 0.248            | 0.248          | 2.361          | 0.116     | 0.0203           |
| litter     | il          | 14         | 0.635            | 0.106          | 1.009          | 0.297     | 0.4588           |
| diet       | ce          | 2          | 0.208            | 0.208          | 1.907          | 0.075     | 0.0139           |
| litter     | ce          | 2          | 0.932            | 0.155          | 1.427          | 0.336     | 0.0049           |
| diet       | ce          | 7          | 0.321            | 0.321          | 3.336          | 0.124     | 1e-04            |
| litter     | ce          | 7          | 0.622            | 0.155          | 1.616          | 0.241     | 0.0016           |
| diet       | ce          | 14         | 0.304            | 0.304          | 3.412          | 0.155     | 1e-04            |
| litter     | ce          | 14         | 0.497            | 0.083          | 0.930          | 0.254     | 0.6815           |
| diet       | co          | 2          | 0.228            | 0.228          | 2.171          | 0.087     | 0.0011           |
| litter     | co          | 2          | 0.934            | 0.156          | 1.482          | 0.355     | 6e-04            |
| diet       | co          | 7          | 0.397            | 0.397          | 4.873          | 0.169     | 1e-04            |
| litter     | co          | 7          | 0.574            | 0.143          | 1.759          | 0.243     | 8e-04            |
| diet       | co          | 14         | 0.319            | 0.319          | 3.504          | 0.156     | 5e-04            |
| litter     | co          | 14         | 0.546            | 0.091          | 1.000          | 0.267     | 0.4686           |

Figure 11: Summary of permutational multivariate analysis of variance (PERMANOVA) test. Each model build on the data across day and gut site is separated by the grey fill.

| Virulence factor | Identity | Query / Template length | Protein function                             | Accession number |
|------------------|----------|-------------------------|----------------------------------------------|------------------|
| K88ab            | 100      | 852 / 852               | K88/F4 protein subunit                       | M25302           |
| K88ab            | 100      | 852 / 852               | K88/F4 protein subunit                       | M25302           |
| astA             | 100      | 117 / 117               | EAST-1 heat-stable toxin                     | AB042002         |
| astA             | 100      | 117 / 117               | EAST-1 heat-stable toxin                     | AB042002         |
| astA             | 100      | 117 / 117               | EAST-1 heat-stable toxin                     | AB042005         |
| astA             | 100      | 117 / 117               | EAST-1 heat-stable toxin                     | AB042005         |
| capU             | 100      | 1089 / 1089             | Hexosyltransferase homolog                   | CP002729         |
| cba              | 100      | 1536 / 1536             | Colicin B                                    | FJ664724         |
| cba              | 100      | 1536 / 1536             | Colicin B                                    | FJ664724         |
| cma              | 100      | 816 / 816               | Colicin M                                    | FJ664737         |
| cma              | 100      | 816 / 816               | Colicin M                                    | FJ664737         |
| gad              | 100      | 1401 / 1401             | Glutamate decarboxylase                      | U00096           |
| gad              | 99.86    | 1401 / 1401             | Glutamate decarboxylase                      | U00096           |
| iha              | 100      | 2091 / 2091             | Adherence protein                            | AE005174         |
| ltcA             | 100      | 777 / 777               | Heat-labile enterotoxin A subunit            | EU113243         |
| ltcA             | 100      | 777 / 777               | Heat-labile enterotoxin A subunit            | EU113243         |
| stb              | 100      | 216 / 216               | Heat-stabile enterotoxin II                  | AY028790         |
| stb              | 100      | 216 / 216               | Heat-stabile enterotoxin II                  | AY028790         |
| terC             | 100      | 1041 / 1041             | Tellurium ion resistance protein             | CP006262         |
| terC             | 99.3     | 714 / 714               | Tellurium ion resistance protein             | CP007491         |
| terC             | 99.37    | 959 / 966               | Tellurium ion resistance protein             | MG591698         |
| traT             | 100      | 423 / 423               | Outer membrane protein complement resistance | AKKX01000148     |
| traT             | 100      | 129 / 129               | Outer membrane protein complement resistance | AMTE01000156     |
| traT             | 100      | 732 / 732               | Outer membrane protein complement resistance | CXZR01000026     |
| traT             | 100      | 732 / 732               | Outer membrane protein complement resistance | CXZR01000026     |

Figure 12: Summary of virulence genes of the *E. coli* challenge strain



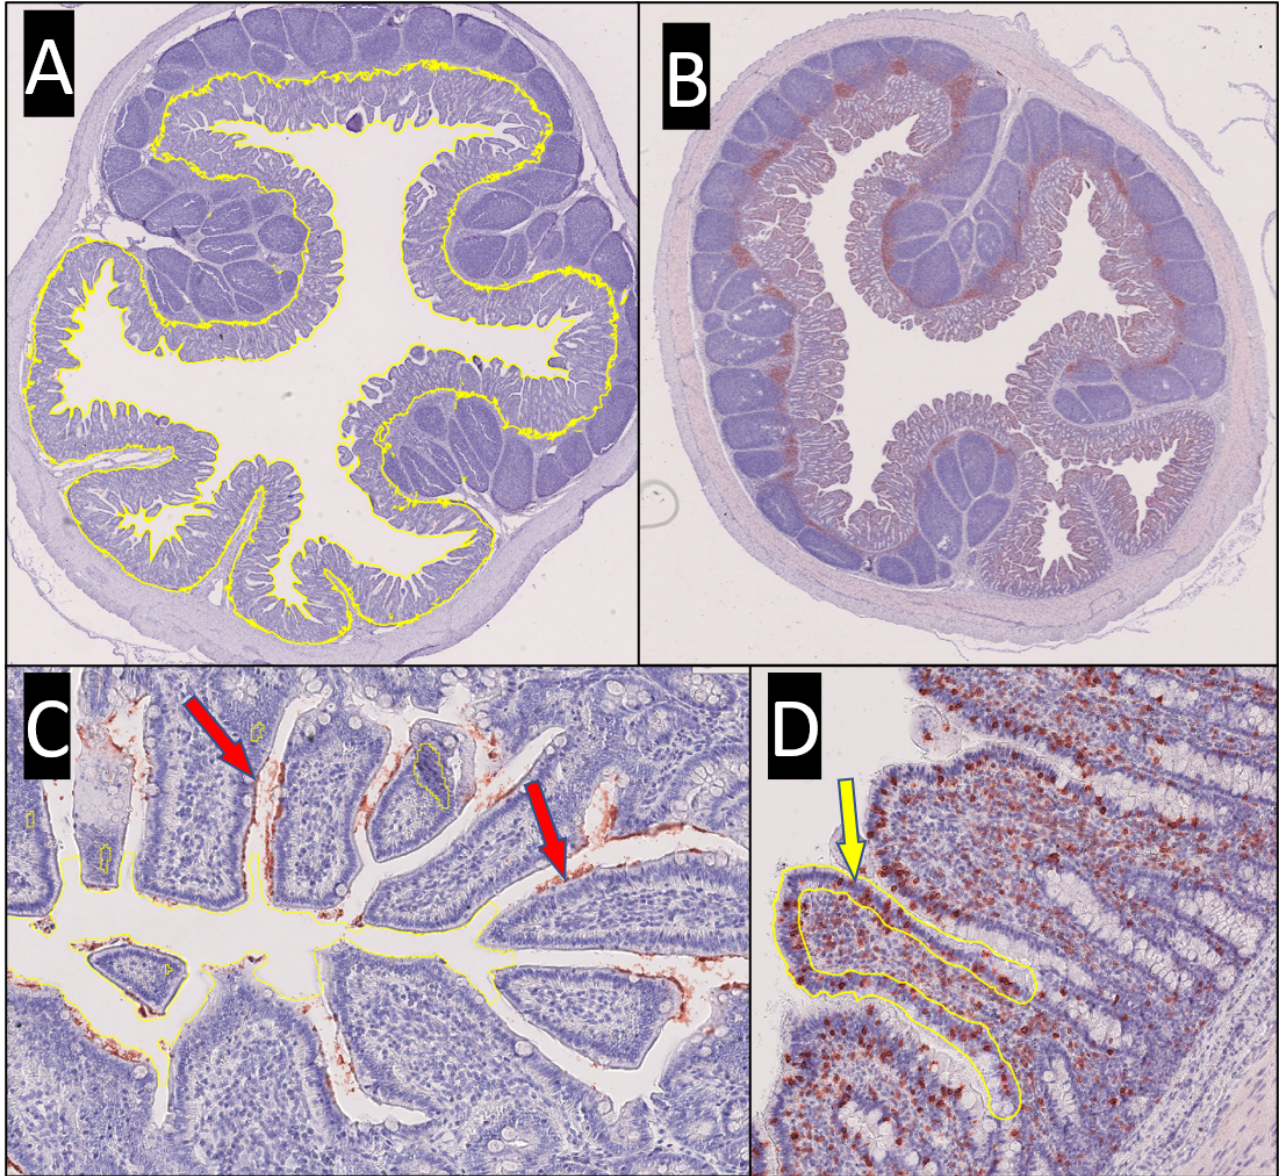

Figure 13: Immunohistochemistry quantification strategy. Panel A: Ileum section with the traced ROI for F4<sup>+</sup> quantification. Panel B: Ileum section labelled for CD3<sup>+</sup> quantification (hematoxylin). Panel C: Magnification of an ileal section with red arrows pointing at representative F4 colonies that were counted. Panel D: Magnification of an ileal section with the traced ROI for CD3<sup>+</sup> quantification.

## 589 References

- 590 [1] M. J. Bale, P. M. Bennett, J. E. Beringer, and M. Hinton. The survival of bacteria exposed  
591 to desiccation on surfaces associated with farm buildings. *Journal of Applied Bacteriology*,  
592 75(6):519–528, 1993. ISSN 13652672. doi: 10.1111/j.1365-2672.1993.tb01589.x.
- 593 [2] W. Wittig and C. Fabricius. Escherichia coli types isolated from porcine E. coli infections  
594 in Saxony from 1963 to 1990. *Zentralblatt für Bakteriologie*, 277(3):389–402, 1992. ISSN  
595 09348840. doi: 10.1016/S0934-8840(11)80918-7.
- 596 [3] J. M. Rutter and G. W. Jones. Protection against enteric disease caused by Escherichia  
597 coli-a model for vaccination with a virulence determinant? *Nature*, 242(5399):531–532,  
598 1973. ISSN 00280836. doi: 10.1038/242531a0.
- 599 [4] H. W. Moon and T. O. Bunn. Vaccines for preventing enterotoxigenic Escherichia coli  
600 infections in farm animals. *Vaccine*, 11(2):213–220, 1993. ISSN 0264410X. doi: 10.1016/  
601 0264-410X(93)90020-X.
- 602 [5] B. Nagy and P. Z. Fekete. Enterotoxigenic Escherichia coli (ETEC) in farm animals.  
603 *Veterinary research*, 30(2-3):259–84, 1999. ISSN 0928-4249. doi: 10.1016/S0928-4249(99)  
604 80020-0.
- 605 [6] K. Frydendahl. Prevalence of serogroups and virulence genes in Escherichia coli associated  
606 with postweaning diarrhoea and edema disease in pigs and a comparison of diagnostic  
607 approaches. *Veterinary Microbiology*, 85(2):169–182, 2002. ISSN 03781135. doi: 10.1016/  
608 S0378-1135(01)00504-1.
- 609 [7] H. Matsumoto, M. Miyagawa, S. Takahashi, R. Shima, and T. Oosumi. Improvement of the  
610 Enterotoxigenic Escherichia coli Infection Model for Post-Weaning Diarrhea by Controlling  
611 for Bacterial Adhesion, Pig Breed and MUC4 Genotype. *Veterinary Sciences*, 7(3):106,  
612 2020. ISSN 23067381. doi: 10.3390/vetsci7030106.
- 613 [8] C. B. Jørgensen, S. Cirera, S. I. Anderson, et al. Linkage and comparative mapping of the  
614 locus controlling susceptibility towards E. coli F4ab/ac diarrhoea in pigs. *Cytogenetic and*  
615 *Genome Research*, 102(1-4):157–162, 2003. ISSN 14248581. doi: 10.1159/000075742.
- 616 [9] P. A. Grange and M. A. Mouricout. Transferrin associated with the porcine intestinal mucosa  
617 is a receptor specific for K88ab fimbriae of Escherichia coli. *Infection and Immunity*, 64(2):  
618 606–610, 1996. ISSN 00199567. doi: 10.1128/iai.64.2.606-610.1996.
- 619 [10] K. Rasschaert, F. Verdonck, B. M. Goddeeris, L. Duchateau, and E. Cox. Screening of pigs  
620 resistant to F4 enterotoxigenic Escherichia coli (ETEC) infection. *Veterinary Microbiology*,  
621 123(1-3):249–253, 2007. ISSN 03781135. doi: 10.1016/j.vetmic.2007.02.017.
- 622 [11] T. Goetstouwers, M. Van Poucke, W. Coppieters, et al. Refined candidate region for F4ab/ac  
623 enterotoxigenic Escherichia coli susceptibility situated proximal to MUC13 in pigs. *PLoS*  
624 *ONE*, 9(8):4–11, 2014. ISSN 19326203. doi: 10.1371/journal.pone.0105013.
- 625 [12] P. L. Conway, A. Welin, and P. S. Cohen. Presence of K88-specific receptors in porcine ileal  
626 mucus is age dependent. *Infection and Immunity*, 58(10):3178–3182, 1990. ISSN 0019-9567.  
627 doi: 10.1128/IAI.58.10.3178-3182.1990.



- 628 [13] P. T. Willemsen and F. K. de Graaf. Age and serotype dependent binding of K88 fimbriae to  
629 porcine intestinal receptors. *Microbial Pathogenesis*, 12(5):367–375, 1992. ISSN 10961208.  
630 doi: 10.1016/0882-4010(92)90099-A.
- 631 [14] R. Sellwood. Escherichia coli-associated porcine neonatal diarrhea: Antibacterial activities  
632 of colostrum from genetically susceptible and resistant sows. *Infection and Immunity*, 35  
633 (2):396–401, 1982. ISSN 00199567. doi: 10.1128/iai.35.2.396-401.1982.
- 634 [15] B. Delisle, C. Calinescu, M. A. Mateescu, J. M. Fairbrother, and É. Nadeau. Oral  
635 immunization with F4 fimbriae and CpG formulated with Carboxymethyl Starch enhances  
636 F4-specific mucosal immune response and modulates Th1 and Th2 cytokines in weaned pigs.  
637 *Journal of Pharmacy and Pharmaceutical Sciences*, 15(5):642–656, 2012. ISSN 14821826.  
638 doi: 10.18433/j30w32.
- 639 [16] V. Melkebeek, B. M. Goddeeris, and E. Cox. ETEC vaccination in pigs. *Veterinary  
640 Immunology and Immunopathology*, 152(1-2):37–42, 2013. ISSN 01652427. doi: 10.1016/  
641 j.vetimm.2012.09.024.
- 642 [17] M. Rhouma, J. M. Fairbrother, F. Beaudry, and A. Letellier. Post weaning diarrhea in pigs:  
643 Risk factors and non-colistin-based control strategies. *Acta Veterinaria Scandinavica*, 59(1):  
644 31, 2017. ISSN 0044605X. doi: 10.1186/s13028-017-0299-7.
- 645 [18] J. M. Foughse, K. Dawson, D. Graugnard, M. Dyck, and B. P. Willing. Dietary  
646 supplementation of weaned piglets with a yeast-derived mannan-rich fraction modulates  
647 cecal microbial profiles, jejunal morphology and gene expression. *Animal*, 13(8):1591–1598,  
648 2019. ISSN 1751732X. doi: 10.1017/S1751731118003361.
- 649 [19] T. M. Che, R. W. Johnson, K. W. Kelley, et al. Effects of mannan oligosaccharide on  
650 cytokine secretions by porcine alveolar macrophages and serum cytokine concentrations  
651 in nursery pigs. *Journal of Animal Science*, 90(2):657–668, 2012. ISSN 00218812. doi:  
652 10.2527/jas.2011-4310.
- 653 [20] E. Stuyven, E. Cox, S. Vancaeneghem, et al. Effect of  $\beta$ -glucans on an ETEC infection  
654 in piglets. *Veterinary Immunology and Immunopathology*, 128(1-3):60–66, 2009. ISSN  
655 01652427. doi: 10.1016/j.vetimm.2008.10.311.
- 656 [21] S. Iakhno, Ö. C. O. Umu, I. M. Håkenåsen, et al. Effect of Cyberlindnera jadinii yeast as a  
657 protein source on intestinal microbiota and butyrate levels in post-weaning piglets. *Animal  
658 Microbiome*, 2(1):13, 2020. ISSN 2524-4671. doi: 10.1186/s42523-020-00031-x.
- 659 [22] Q. Guo, J. Z. Goldenberg, C. Humphrey, R. El Dib, and B. C. Johnston. Probiotics  
660 for the prevention of pediatric antibiotic-associated diarrhea. *The Cochrane database of  
661 systematic reviews*, 4(4):CD004827–CD004827, 2019. ISSN 1469-493X. doi: 10.1002/  
662 14651858.CD004827.pub5.
- 663 [23] V. Lievin-Le Moal and A. L. Servin. Anti-Infective Activities of Lactobacillus Strains  
664 in the Human Intestinal Microbiota: from Probiotics to Gastrointestinal Anti-Infectious  
665 Biotherapeutic Agents. *Clinical Microbiology Reviews*, 27(2):167–199, 2014. ISSN 0893-8512.  
666 doi: 10.1128/CMR.00080-13.

- 667 [24] R. Knight, A. Vrbanc, B. C. Taylor, et al. Best practices for analysing microbiomes. *Nature*  
668 *Reviews Microbiology*, 16(7):410–422, 2018. ISSN 1740-1526. doi: 10.1038/s41579-018-0029-  
669 9.
- 670 [25] H.-C. Chaung, T.-C. Huang, J.-H. Yu, M.-L. Wu, and W.-B. Chung. Immunomodulatory  
671 effects of  $\beta$ -glucans on porcine alveolar macrophages and bone marrow haematopoietic  
672 cell-derived dendritic cells. *Veterinary Immunology and Immunopathology*, 131(3-4):147–157,  
673 2009. ISSN 01652427. doi: 10.1016/j.vetimm.2009.04.004.
- 674 [26] I. M. Håkenåsen, M. Øverland, R. Ånestad, et al. Gene expression and gastrointestinal  
675 function is altered in piglet small intestine by weaning and inclusion of *Cyberlindnera jadinii*  
676 yeast as a protein source. *Journal of Functional Foods*, 73(March), 2020. ISSN 17564646.  
677 doi: 10.1016/j.jff.2020.104118.
- 678 [27] L. Lagos, A. K. Bekkelund, A. Skugor, et al. *Cyberlindnera jadinii* Yeast as a Protein  
679 Source for Weaned Piglets—Impact on Immune Response and Gut Microbiota. *Frontiers in*  
680 *Immunology*, 11(September):1–16, 2020. ISSN 1664-3224. doi: 10.3389/fimmu.2020.01924.
- 681 [28] B. N. Noamani, J. M. Fairbrother, and C. L. Gyles. Virulence genes of O149 enterotoxigenic  
682 *Escherichia coli* from outbreaks of postweaning diarrhea in pigs. *Veterinary Microbiology*,  
683 97(1-2):87–101, 2003. ISSN 03781135. doi: 10.1016/j.vetmic.2003.08.006.
- 684 [29] R. Amezcua, R. M. Friendship, and C. E. Dewey. An investigation of the presence of  
685 *Escherichia coli* O149:K91 :F4 on pig farms in southern Ontario and the use of antimicrobials  
686 and risk factors associated with the presence of this serogroup. *Canadian Veterinary Journal*,  
687 49(1):39–45, 2008. ISSN 00085286.
- 688 [30] C. R. Risley, E. T. Kornegay, M. D. Lindemann, C. M. Wood, and W. N. Eigel. Effect of  
689 feeding organic acids on gastrointestinal digesta measurements at various times postweaning  
690 in pigs challenged with enterotoxigenic *Escherichia coli*. *Canadian Journal of Animal*  
691 *Science*, 73(4):931–940, 1993. ISSN 0008-3984. doi: 10.4141/cjas93-094.
- 692 [31] A. Cruz, I. M. Håkenåsen, A. Skugor, et al. *Candida utilis* yeast as a protein source for  
693 weaned piglets: Effects on growth performance and digestive function. *Livestock Science*,  
694 226(March):31–39, 2019. ISSN 18711413. doi: 10.1016/j.livsci.2019.06.003.
- 695 [32] M. J. Murray and A. B. Murray. Anorexia of infection as a mechanism of host defense.  
696 *The American Journal of Clinical Nutrition*, 32(3):593–596, 1979. ISSN 0002-9165. doi:  
697 10.1093/ajcn/32.3.593.
- 698 [33] A. Wang, S. C. Huen, H. H. Luan, et al. Opposing Effects of Fasting Metabolism on Tissue  
699 Tolerance in Bacterial and Viral Inflammation. *Cell*, 166(6):1512–1525.e12, 2016. ISSN  
700 00928674. doi: 10.1016/j.cell.2016.07.026.
- 701 [34] D. P. Hoytema van Konijnenburg, B. S. Reis, V. A. Pedicord, et al. Intestinal Epithelial  
702 and Intraepithelial T Cell Crosstalk Mediates a Dynamic Response to Infection. *Cell*, 171  
703 (4):783–794.e13, 2017. ISSN 00928674. doi: 10.1016/j.cell.2017.08.046.
- 704 [35] R. M. Duar, X. B. Lin, J. Zheng, et al. Lifestyles in transition: evolution and natural  
705 history of the genus *Lactobacillus*. *FEMS microbiology reviews*, 41(1):S27–S48, 2017. ISSN  
706 15746976. doi: 10.1093/femsre/fux030.

- 707 [36] X. B. Lin, T. Wang, P. Stothard, et al. The evolution of ecological facilitation within  
708 mixed-species biofilms in the mouse gastrointestinal tract. *ISME Journal*, 12(11):2770–2784,  
709 2018. ISSN 17517370. doi: 10.1038/s41396-018-0211-0.
- 710 [37] G. W. Tannock, C. M. Wilson, D. Loach, et al. Resource partitioning in relation to  
711 cohabitation of *Lactobacillus* species in the mouse forestomach. *The ISME Journal*, 6(5):  
712 927–938, 2012. ISSN 1751-7362. doi: 10.1038/ismej.2011.161.
- 713 [38] M. G. Gänzle and R. Follador. Metabolism of Oligosaccharides and Starch in *Lactobacilli*:  
714 A Review. *Frontiers in Microbiology*, 3(SEP):1–15, 2012. ISSN 1664-302X. doi: 10.3389/  
715 fmicb.2012.00340.
- 716 [39] L. Michalak, J. C. Gaby, L. Lagos, et al. Microbiota-directed fibre activates both targeted  
717 and secondary metabolic shifts in the distal gut. *Nature Communications*, 2019. ISSN  
718 2041-1723. doi: 10.1101/799023.
- 719 [40] R. Charlet, C. Bortolus, B. Sendid, and S. Jawhara. *Bacteroides thetaiotaomicron* and  
720 *Lactobacillus johnsonii* modulate intestinal inflammation and eliminate fungi via enzymatic  
721 hydrolysis of the fungal cell wall. *Scientific Reports*, 10(1):1–13, 2020. ISSN 20452322. doi:  
722 10.1038/s41598-020-68214-9.
- 723 [41] G. Buist, A. Steen, J. Kok, and O. P. Kuipers. LysM, a widely distributed protein motif for  
724 binding to (peptido)glycans. *Molecular Microbiology*, 68(4):838–847, 2008. ISSN 0950382X.  
725 doi: 10.1111/j.1365-2958.2008.06211.x.
- 726 [42] S. Fakhry, N. Manzo, E. D’Apuzzo, et al. Characterization of intestinal bacteria tightly  
727 bound to the human ileal epithelium. *Research in Microbiology*, 160(10):817–823, 2009.  
728 ISSN 09232508. doi: 10.1016/j.resmic.2009.09.009.
- 729 [43] J. Ø. Hansen, L. Lagos, P. Lei, et al. Down-stream processing of baker’s yeast  
730 (*Saccharomyces cerevisiae*) – Effect on nutrient digestibility and immune response in  
731 Atlantic salmon (*Salmo salar*). *Aquaculture*, 530(5006):735707, 2021. ISSN 00448486. doi:  
732 10.1016/j.aquaculture.2020.735707.
- 733 [44] R. R. Wick, L. M. Judd, C. L. Gorrie, and K. E. Holt. Unicycler: Resolving bacterial  
734 genome assemblies from short and long sequencing reads. *PLoS Computational Biology*, 13  
735 (6):1–22, 2017. ISSN 15537358. doi: 10.1371/journal.pcbi.1005595.
- 736 [45] L. M. Rodriguez-R, S. Gunturu, W. T. Harvey, et al. The Microbial Genomes Atlas (MiGA)  
737 webserver: taxonomic and gene diversity analysis of Archaea and Bacteria at the whole  
738 genome level. *Nucleic Acids Research*, 46(W1):W282–W288, 2018. ISSN 0305-1048. doi:  
739 10.1093/nar/gky467.
- 740 [46] K. G. Joensen, F. Scheutz, O. Lund, et al. Real-Time Whole-Genome Sequencing for Routine  
741 Typing, Surveillance, and Outbreak Detection of Verotoxigenic *Escherichia coli*. *Journal of*  
742 *Clinical Microbiology*, 52(5):1501–1510, 2014. ISSN 0095-1137. doi: 10.1128/JCM.03617-13.
- 743 [47] K. S. Pedersen and N. Toft. Intra- and inter-observer agreement when using a descriptive  
744 classification scale for clinical assessment of faecal consistency in growing pigs. *Preventive*  
745 *Veterinary Medicine*, 2011. ISSN 01675877. doi: 10.1016/j.prevetmed.2010.11.016.



- 746 [48] B. J. Callahan, P. J. McMurdie, M. J. Rosen, et al. DADA2: High-resolution sample  
747 inference from Illumina amplicon data. *Nature methods*, 13(7):581–583, 2016. ISSN  
748 1548-7105. doi: 10.1038/nmeth.3869.
- 749 [49] T. Z. DeSantis, P. Hugenholtz, N. Larsen, et al. Greengenes, a chimera-checked 16S  
750 rRNA gene database and workbench compatible with ARB. *Applied and environmental*  
751 *microbiology*, 72(7):5069–5072, 2006. ISSN 0099-2240. doi: 10.1128/AEM.03006-05.
- 752 [50] K. Schliep, A. J. Potts, D. A. Morrison, and G. W. Grimm. Intertwining phylogenetic trees  
753 and networks. *Methods in Ecology and Evolution*, 8(10):1212–1220, 2017. ISSN 2041-210X.  
754 doi: 10.1111/2041-210X.12760.
- 755 [51] A. Willis and B. Martin. DivNet: Estimating diversity in networked communities. *bioRxiv*,  
756 page 305045, 2018. doi: 10.1101/305045.
- 757 [52] B. D. Martin, D. Witten, and A. D. Willis. Modeling microbial abundances and dysbiosis  
758 with beta-binomial regression. *Ann. Appl. Stat.*, 14(1):94–115, 2020. ISSN 1932-6157. doi:  
759 10.1214/19-AOAS1283.
- 760 [53] P. J. McMurdie and S. Holmes. phyloseq: An R Package for Reproducible Interactive  
761 Analysis and Graphics of Microbiome Census Data. *PLOS ONE*, 8(4):e61217, 2013.
- 762 [54] Z. D. Kurtz, C. L. Müller, E. R. Miraldi, et al. Sparse and compositionally robust inference  
763 of microbial ecological networks. *PLOS Computational Biology*, 11(5):e1004226, 2015. doi:  
764 10.1371/journal.pcbi.1004226.
- 765 [55] D. Makowski, M. Ben-Shachar, and D. Lüdecke. bayestestR: Describing Effects and their  
766 Uncertainty, Existence and Significance within the Bayesian Framework. *Journal of Open*  
767 *Source Software*, 2019. ISSN 2475-9066. doi: 10.21105/joss.01541.
- 768 [56] B. Goodrich, J. Gabry, and S. Brilleman, rstanarm: Bayesian Applied Regression Modeling  
769 via Stan, 2019.
